1       **Liposomal encapsulation of polysaccharides (LEPS) as an effective vaccine strategy to**  
2                               **protect aged hosts against *S. pneumoniae* infection**

3

4       **Authors:** Manmeet Bhalla<sup>1,#</sup>, Roozbeh Nayerhoda<sup>2,#</sup>, Essi Y. I. Tchalla<sup>1</sup>, Alexandra Abamonte<sup>1</sup>,  
5       Dongwon Park<sup>3</sup>, Shaunna R. Simmons<sup>1</sup>, Blaine A. Pfeifer<sup>3,4\*</sup>, Elsa N. Bou Ghanem<sup>1\*</sup>

6       **Author Affiliations:** <sup>1</sup>Department of Microbiology and Immunology, University at Buffalo, The  
7       State University of New York, Buffalo, NY

8       <sup>2</sup>Department of Biomedical Engineering, University at Buffalo, The State University of New York,  
9       Buffalo, NY

10      <sup>3</sup>Department of Chemical and Biological Engineering, University at Buffalo, The State University  
11      of New York, Buffalo, NY

12      <sup>4</sup>Gene and Tissue Engineering Center, University at Buffalo, The State University of New York,  
13      Buffalo, NY

14      # These authors share first authorship

15      \* These authors contributed equally to this work and share senior authorship.

16      \* **Correspondence:** Elsa N. Bou Ghanem (elsaboug@buffalo.edu) and Blaine A. Pfeifer  
17      (blaineopf@buffalo.edu)

18

19      **Running title:** LEPS vaccine for age-related pneumococcal disease

20      **Keywords:** pneumococcal disease, aging, vaccines, liposomes, immunosenescence, antibodies

21

22

23

24

25

26

27

28

29

30

31

32 **Abstract**

33 Despite the availability of licensed vaccines, pneumococcal disease caused by the bacteria  
34 *Streptococcus pneumoniae* (pneumococcus), remains a serious infectious disease threat  
35 globally. Disease manifestations include pneumonia, bacteremia, and meningitis, resulting in over  
36 a million deaths annually. Pneumococcal disease disproportionately impacts elderly individuals  $\geq 65$   
37 years old. Interventions are complicated through a combination of complex disease progression  
38 and 100 different bacterial capsular polysaccharide serotypes. This has made it challenging to  
39 develop a broad vaccine against *S. pneumoniae*, with current options utilizing capsular  
40 polysaccharides as the primary antigenic content. However, current vaccines are substantially  
41 less effective in protecting the elderly. We previously developed a Liposomal Encapsulation of  
42 Polysaccharides (LEPS) vaccine platform, designed around limitations of current pneumococcal  
43 vaccines, that allowed the non-covalent coupling of polysaccharide and protein antigen content  
44 and protected young hosts against pneumococcal infection in murine models. In this study, we  
45 modified the formulation to make it more economical and tested the novel LEPS vaccine in aged  
46 hosts. We found that in young mice (2-3 months), LEPS elicited comparable responses to the  
47 pneumococcal conjugate vaccine Prevnar-13. Further, LEPS immunization of old mice (20-22  
48 months) induced comparable antibody levels and improved antibody function compared to  
49 Prevnar-13. Importantly, LEPS protected old mice against both invasive and lung localized  
50 pneumococcal infections. In summary, LEPS is an alternative and effective vaccine strategy that  
51 protects aged hosts against different manifestations of pneumococcal disease.

52

53

54

55

56

57

## 58 1. Introduction

59 *Streptococcus pneumoniae* (pneumococcus) is an opportunistic pathogen that  
60 asymptotically resides in the upper respiratory tract of humans but can cause serious life-  
61 threatening infections (1, 2). These include pneumonia which can progress to invasive  
62 pneumococcal disease leading to bacteremia, meningitis, and endocarditis (3, 4). Pneumococcal  
63 infections result in more than a million deaths annually worldwide (1), and in the USA alone, the  
64 estimated annual direct medical cost associated with pneumococcal disease is approximately  
65 \$3.5 billion (5, 6). Pneumococcal infections are more problematic in elderly individuals (above 65  
66 years of age) in terms of both health burden and treatment cost (6, 7). Despite the availability of  
67 vaccines and antibiotics, *S. pneumoniae* remains the leading cause of community acquired  
68 bacterial pneumonia and nursing home associated pneumonia in the elderly (8-10). Older  
69 individuals account for 71% of all pneumococcal cases and 82% of associated deaths (11). The  
70 yearly cost associated with hospitalization in this population will increase significantly as the  
71 number of elderly individuals is projected to double in the coming decades (12). To further  
72 complicate the current health concerns, elderly individuals are more at risk of acquiring drug-  
73 resistant infections (13) which is on a rise in *S. pneumoniae* (14).

74 There are 100 different *S. pneumoniae* serotypes identified based upon capsular  
75 polysaccharide content (15, 16), which in part regulates the severity of pneumococcal disease  
76 (17). Currently licensed vaccine formulations consist of capsular polysaccharides from the most  
77 common disease-causing *S. pneumoniae* serotypes prevalent globally. The pneumococcal  
78 polysaccharide vaccine (Pneumovax 23/PPSV23) consists of polysaccharides from 23  
79 pneumococcal serotypes and elicits a T cell-independent antibody response, while the  
80 pneumococcal conjugate vaccine (Prevnar 13/PCV13) is comprised of 13 serotypes covalently  
81 linked to a diphtheria toxoid CRM197 carrier protein which produces a T cell-dependent immune  
82 response in the host (18). There are several limitations to the current vaccines, one of which is

83 the phenomenon of serotype replacement wherein the targeting of a certain and limited number  
84 of pneumococcal serotypes by these vaccines has led to an increased prevalence of non-vaccine  
85 serotypes (19, 20). In addition, having only polysaccharides-centric vaccine formulations results  
86 in serotype-specific antibodies which mainly target nasopharyngeal colonization or the invasive  
87 stage of pneumococcal infection during which *S. pneumoniae* upregulate capsule expression to  
88 survive the host immune response. This strategy provides only limited host protection given the  
89 fact that pneumococcus undergoes transcriptomic changes to alter expression of several factors,  
90 including capsule expression, when transitioning from the stage of colonization to pulmonary or  
91 systemic infection (21, 22). Moreover, the recent emergence of disease-associated non-  
92 encapsulated pneumococcal strains carrying antibiotic resistance genes (23) highlights the  
93 necessity of novel vaccine formulations, which in addition to serotype-specific polysaccharide  
94 content, also need to include other pneumococcal antigen(s), ideally the ones shared by multiple  
95 *S. pneumoniae* serotypes to broaden vaccine coverage.

96 In response, we have previously developed an alternative vaccine platform termed  
97 Liposomal Encapsulation of Polysaccharides (LEPS) which is designed to address the limitations  
98 of current vaccine options (24). With LEPS, pneumococcal capsular polysaccharides are localized  
99 internally within the liposomal carrier. To date, we have included final LEPS formulations with up  
100 to 24 different serotype polysaccharides (25). To mimic conjugated vaccine options (such as  
101 PCV13), the LEPS vehicle is engineered with a noncovalent surface attachment mechanism to  
102 localize protein components. In the past, we have surface localized both CRM197 and a *S.*  
103 *pneumoniae* protein antigen (PncO) that is upregulated during transition of pneumococci from a  
104 benign colonizer to a more invasive pathogen and that is well-conserved across pneumococcal  
105 strains (24, 25). The LEPS platform thus allows for a broad degree of serotype coverage,  
106 provokes the same immune response provided by conjugate vaccines, and can be tailored to

107 include a protein component that can account for the different stages of pneumococcal disease  
108 progression.

109         The efficacy of currently licensed pneumococcal vaccines, defined as prevention of  
110 infection by vaccine serotypes, is limited in the elderly. Although protective against bacteremia,  
111 PCV13 and PPSV23 show only 45% and 33% protection, respectively, against pneumonia in  
112 older individuals (18). This is largely driven by an overall decline in the immune system with aging,  
113 also known as immunosenescence, which results in reduced antibody levels and function  
114 following vaccination with PPSV23 (26) and PCV13 (27) in elderly individuals. With the success  
115 demonstrated by the LEPS vaccine in young mice, as assessed for serotype coverage and  
116 directed protection from *S. pneumoniae* challenge, we conducted the current study to test the  
117 LEPS vaccine in aged hosts in preclinical murine models of infection. We present data with old  
118 mice that support the prospect of the LEPS platform for effective prevention of pneumococcal  
119 disease within aged hosts.

120

## 121 **2. Materials and Methods**

### 122 **2.1 Ethics statement**

123         All animal studies were performed in accordance with the recommendations in the Guide  
124 for the Care and Use of Laboratory Animals. Procedures were reviewed and approved by the  
125 University at Buffalo Institutional Animal Care and Use Committee.

### 126 **2.2 Mice**

127         All the animal work was done in C57BL/6 young (2-3 months) and old (22-24 months)  
128 male mice. The mice were purchased from Jackson Laboratories (Bar Harbor, Maine) and the  
129 National Institute on Aging colonies and housed in a specific-pathogen-free facility at the  
130 University at Buffalo.

### 131 **2.3 Bacterial strains and growth conditions**

132 *Streptococcus pneumoniae* serotypes 4 (TIGR4 strain) and 19F (P1084 strain) were a  
133 kind gift from Andrew Camilli (Tufts University). Bacteria were grown to mid-log phase  
134 (corresponding to an OD<sub>650nm</sub> of 0.7-0.8) in Todd–Hewitt broth (BD Biosciences) supplemented  
135 with Oxyrase and 0.5% yeast extract at 37°C/5% carbon dioxide. Aliquots were frozen at –80°C  
136 in growth media with 20% glycerol. Prior to use, aliquots were thawed on ice, washed and diluted  
137 in phosphate buffered saline to required numbers. Bacterial titers were confirmed by plating on  
138 tryptic soy agar plates supplemented with 5% sheep blood agar (Hardy Diagnostics).

#### 139 **2.4 Protein production and purification**

140 Recombinant production of the PncO protein antigen was accomplished as reported  
141 previously (24, 25, 28, 29). Briefly, *Escherichia coli* strain BL21(DE3) containing a plasmid with  
142 the PncO gene was grown in lysogeny broth (LB) medium with ampicillin (100 µM) while shaking  
143 overnight at 37°C. The overnight culture was diluted 1:1000 into LB (with ampicillin) and grown  
144 under the same conditions to an OD<sub>600nm</sub> of 0.4-0.5. The culture was then induced by adding  
145 isopropyl β-D-1-thiogalactopyranoside (IPTG; 300 µM) and incubated with shaking at 30°C for six  
146 hours. The cell culture was harvested by centrifugation for 15 min at 3,200 rcf at 4°C. The resulting  
147 pellet was resuspended gently in Buffer A (50 mM Na<sub>2</sub>HPO<sub>4</sub>, 500 mM NaCl, and 10% glycerol  
148 (pH 7.5), placed in ice, and the suspended cells lysed by sonication using a small, tapered tip in  
149 3 cycles of 45 s on and 60 s off at 50 Amp, 20 kHz. The post-sonication solution was centrifuged  
150 for 15 min at 12,000 rcf at 4°C. The supernatant was maintained at 4°C for protein purification  
151 with a prepared HisTrap HP column (GE Healthcare). Purified protein samples were  
152 concentrated using an Amicon 4 centrifugal filtration tube centrifuged for 5 min at 3600 rcf (4 °C),  
153 and the final protein concentration was measured via Bradford analysis (Thermo Fisher).

#### 154 **2.5 LEPS formulation, assembly, and assessment**

155 LEPS formulation and assessment was completed as previously reported (24, 25, 28,  
156 29). Briefly, all lipids were purchased from Avanti, Thermo Fisher, or Sigma Aldrich, and  
157 pneumococcal polysaccharides serotype 19F and 4 were obtained from ATCC. 1:2-dioleoyl-sn-

158 glycerol-3-phospho-(1'-rac-glycerol) (DOPG), 1,2-dioleoyl-sn-glycero-3-phosphocholine  
159 (DOPC), 1,2-dioleoyl-sn-glycero-3-[(N-(5-amino-1-carboxypentyl)iminodiacetic acid)succinyl]  
160 (nickel salt) (DGS-NTA(Ni)), 1,2-distearoyl-sn-glycero-3-phosphoethanolamine-N-  
161 [amino(polyethylene glycol)-2000] (ammonium salt) (DSPE-PEG(2000)), and cholesterol were  
162 dissolved in chloroform with the molar ratio of 3:3:1:0.1:4. Then, 19F and 4 solutions with  
163 concentrations of 2.2 µg per dose were separately added to different lipid mixtures and vortexed  
164 for 1 minute. Both lipid mixtures were fully evaporated using a rotatory evaporator until a thin  
165 film was formed and then rehydrated with PBS at 45°C to dissolve the film prior to extrusion  
166 through a 200 nm pore size membrane of a handheld extruder. The resulting liposomes  
167 encapsulating the polysaccharides were separated from free floating and unencapsulated  
168 polysaccharides by centrifugation for 5 minutes at 1,200 rcf and 4°C using a centrifugal tube  
169 with a 300 kDa (Pall Co) filtration device. After readjusting to the initial volume with PBS, 34 µg  
170 per of the PncO protein was incubated with the liposome solution for 30 minutes at room  
171 temperature. The centrifugation step with filtered tubes was repeated twice to separate the  
172 unbound protein, resulting in the final formulation of liposome encapsulating PS with bound  
173 protein on the liposomal surface. To this final formulation, 125 µg per dose of aluminum  
174 phosphate was added.

## 175 **2.6 Mice immunization and sera collection**

176 Mice were immunized via intramuscular injection into the caudal thigh muscle (30) with 50  
177 µL of the following vaccine formulations: LEPS containing PncO, alum and either serotype 4 or  
178 19F capsular polysaccharide antigen (LEPS); Prevnar 13 (PCV13) (Wyeth Pharmaceuticals); or  
179 the controls PBS (Sham) and empty LEPS vector (Empty LEPS plus alum). PCV13 was  
180 administered as a single dose, as approved for human use. Booster doses of LEPS or Empty  
181 LEPS were given at two weeks following the first inoculation. Sera from each mouse were  
182 collected from the tail vein at weeks 2 and 4 following the initial vaccination and saved at -80°C  
183 for quantification of antibody titers (31). Sera from each mouse were collected via cardiac

184 puncture 4 weeks following the initial vaccination, pooled per group and saved at  $-80^{\circ}\text{C}$  for  
185 quantification of antibody function.

## 186 **2.7 Measurement of antibody titer**

187 Enzyme-linked immunosorbent assay (ELISA) was used to determine the antibody titer  
188 from the sera samples, as previously described (30, 32). Briefly, Nunc maxisorp plates were  
189 coated overnight at  $4^{\circ}\text{C}$  with type 4 pneumococcal polysaccharide (ATCC) or type 19F  
190 pneumococcal polysaccharide (ATCC), each at  $2\ \mu\text{g}/\text{well}$ , or heat killed *S. pneumoniae* TIGR4  
191 strain at  $2 \times 10^5$  colony forming units (CFU)/well. For type 4 and type 19F polysaccharide  
192 conditions, the sera were preabsorbed with a pneumococcal cell wall polysaccharide mixture  
193 (CWP-multi, Cederlane) to neutralize noncapsular Abs and added to the plate. Following  
194 incubation with sera samples, pneumococcal-specific Abs were detected using horseradish  
195 peroxidase–conjugated goat anti-mouse immunoglobulin M (IgM; Invitrogen), IgG (Millipore  
196 Sigma), or IgG1, IgG2b, IgG2c, or IgG3 (Southern Biotech) followed by addition of TMB substrate  
197 (Thermo Scientific). Readings were taken at  $\text{OD}_{650}$  using a BioTek reader with a program set for  
198 kinetic ELISAs where readings were taken every minute for a total of 10 minutes. Antibody units  
199 were calculated as percentages of a hyperimmune standard sera included in each ELISA.  
200 Hyperimmune standard sera were generated as previously described (31, 32). Briefly, C57BL/6  
201 young mice were intranasally inoculated with *S. pneumoniae* TIGR4 or 19F over the period of 4  
202 weeks with once weekly inoculations, as previously described (32). Mice were then immunized  
203 with PCV13 at week 4. Approximately, 4 weeks following PCV13 vaccination, mice were  
204 euthanized, sera collected and pooled, and aliquots stored at  $-80^{\circ}\text{C}$ . Total antibody levels in the  
205 circulation were then determined in sera from sham treated controls (naïve) for each age group  
206 and the hyperimmune standard serum using antibody quantification kits from Invitrogen for IgG  
207 (88-50400), IgM (88-50470), IgG1 (88-50410), IgG2b (88-50430), IgG2c (88-50670), and IgG3  
208 (88-50440). To calculate the total amounts of anti-pneumococcal antibodies, the antibody levels  
209 in the naïve sera was subtracted from the hyperimmune standard sera and total antibody levels



210 in the different sera samples were then extrapolated using the measured percentages of the  
211 hyperimmune standard sera.

## 212 **2.8 PMN isolation**

213 PMNs were isolated from the bone marrow of naïve young and old C57BL/6 mice through  
214 density gradient centrifugation, using Histopaque 1119 and Histopaque 1077, as previously  
215 described (31, 33). Following isolation, the PMNs were resuspended in Hanks' Balanced Salt  
216 Solution (HBSS)/0.1% gelatin without  $\text{Ca}^{2+}$  and  $\text{Mg}^{2+}$  and kept on ice until used in subsequent  
217 assays.

## 218 **2.9 Opsonophagocytic killing**

219 The opsonic capacity of antibodies in the sera was determined using an opsonophagocytic  
220 (OPH) killing assay with primary PMNs, as previously described (31, 33-37). Briefly,  $1 \times 10^3$   
221 bacteria (*S. pneumoniae* TIGR4) grown to mid-log phase were incubated with 3% sera from mice  
222 immunized with the LEPS formulation containing serotype 4 capsular polysaccharide antigen,  
223 PCV13, or the controls (Sham or Empty LEPS vector). Reactions were rotated for 40 min at 37°C  
224 to allow opsonization. Following opsonization, bacteria were mixed with  $1 \times 10^5$  PMNs in 100  $\mu\text{L}$   
225 reactions of HBSS/0.1% gelatin. Reactions were then rotated for 45 min at 37°C. Following  
226 incubation, the plates were kept on ice for 2 min to stop the reaction. The ability of sera from each  
227 treatment group to induce opsonophagocytic killing of bacteria by PMNs was then determined by  
228 plating the reaction mixtures on blood agar plates and comparing colony counts and calculating  
229 the percent of bacteria killed with respect to a no PMN control under the exact sera conditions.

## 230 **2.10 Binding assay using H292 cells**

231 The ability of sera to neutralize the binding of *S. pneumoniae* to pulmonary epithelium was  
232 determined through an assay using human pulmonary mucoepidermoid carcinoma-derived NCI-  
233 H292 (H292) cells (ATCC), as previously described (38). H292 cells were grown and maintained  
234 following a previously described protocol (38, 39). Approximately,  $2.5 \times 10^5$  epithelial cells were  
235 seeded in tissue culture-treated flat bottom 96-well plates (Corning) and allowed to adhere

236 overnight. The following day, cells were washed three times with PBS and infected with the *S.*  
237 *pneumoniae* TIGR4 strain at a multiplicity of infection (MOI) of 10 in antibiotic-free media. Prior to  
238 infection, bacteria were opsonized for 40 min at 37°C with 10% sera from mice immunized with  
239 serotype 4 LEPS, PCV13, or the controls (Sham or Empty LEPS). The reaction plates were spun  
240 down to facilitate cell-bacterial interaction and incubated for 1 hr at 37°C/CO<sub>2</sub>. The cells were then  
241 washed five times with PBS to remove unbound bacteria, lifted with 0.05%  
242 trypsin/ethylenediaminetetraacetic acid (EDTA) (Invitrogen), and mixed vigorously to produce a  
243 homogeneous solution. Serial dilutions were then plated on blood agar plates to determine the  
244 bacterial CFU. The percent of bacteria bound was determined with respect to a no cell control of  
245 the same sera condition where bacteria were added to the wells and incubated for an hour under  
246 the same experimental conditions. The number of bacteria bound to H292 cells in the Sham sera  
247 condition was set as 100% and relative changes in bacterial binding were then calculated for other  
248 sera conditions.

## 249 **2.11 Animal infections**

250 Mice were infected with *S. pneumoniae*, as previously described (32, 35). Briefly, mice  
251 were intratracheally (i.t) challenged with either the serotype 4 ( $5 \times 10^5$  CFU) or 19F ( $2 \times 10^7$  CFU)  
252 strain of *S. pneumoniae*. Following infection with the *S. pneumoniae* serotype 4 strain, mice were  
253 monitored daily over 2 weeks for survival and clinical signs of disease (weight loss, activity level,  
254 posture, and breathing, scored healthy [0] to severely sick [21], as previously described (32, 35))  
255 while bacteremia was determined for up to 72 hr post infection. In case of infection with the *S.*  
256 *pneumoniae* serotype 19F strain, mice were scored for clinical signs of disease at twenty-four  
257 hours post infection and euthanized to assess bacterial burden in the lung. Lung homogenates  
258 and blood were assessed for CFU by plating on blood agar plates.

## 259 **2.12 Statistical analysis**

260 All statistical analysis was performed using Prism9 (Graph Pad). Data with bacterial  
261 numbers in blood and lungs were log-transformed to normalize distribution. Bar graphs represent

262 the mean values  $\pm$  standard deviation (SD) and line graphs represent the mean values  $\pm$  95%  
263 confidence interval of the mean (CI). Significant differences were determined with one-way  
264 ANOVA followed by Tukey's multiple comparisons test as indicated. Survival was analyzed using  
265 the log-rank (Mantel-Cox) test. Differences between fractions were determined by Fisher's exact  
266 test. All  $p$  values  $< 0.05$  were considered significant.

267

### 268 **3. Results**

#### 269 **3.1 LEPS and Pevnar-13 vaccination induce comparable antibody production in young** 270 **hosts against *S. pneumoniae***

271 We had previously shown that a LEPS formulation constructed with surface localized  
272 CRM197, to mimic conjugated vaccine options, conferred a similar degree of immunogenicity and  
273 protection against *S. pneumoniae* as the pneumococcal conjugate vaccine Pevnar-13 (PCV13)  
274 in young mice (24). In an effort to simplify and economize, we altered the LEPS vaccine by  
275 replacing CRM197 with the pneumococcal protein antigen PncO (Fig. 1A). To test if the modified  
276 LEPS vaccine is immunogenic and still mimics the immunological outcome of PCV13, we first  
277 examined the antibody production in young (2 months old) C57BL/6 mice. Mice were immunized  
278 by intramuscular injection with the following vaccine formulations (i) LEPS containing capsular  
279 polysaccharide conjugated with PncO with alum as adjuvant (LEPS); (ii) PCV13; (iii) a PBS control  
280 (Sham); and (iv) an empty LEPS control with alum (Empty LEPS), following the schedule  
281 presented in Fig. 1B. Sera from each mouse was collected over time to measure antibody levels  
282 (timeline in Fig. 1B).

283 Serum antibody response was measured using ELISAs against purified polysaccharide.  
284 We found that LEPS vaccination was able to induce IgM production at levels that were significantly  
285 higher than the Empty LEPS and that were comparable to those induced by PCV13 (Fig. 2A). An  
286 important feature of the PCV13 vaccine is the presence of the covalently attached CRM197

287 protein, which induces T-cell-mediated IgG class switching. To confirm that the LEPS vaccine still  
288 elicited IgG class switching (with only PncO as the noncovalently affixed protein conjugate), we  
289 next measured total antibody levels as well as the different subtypes of IgG produced. We found  
290 that while no IgG was detected in the Empty LEPS treated controls (Fig. 2B), LEPS vaccination  
291 induced IgG production that was comparable to PCV13 (Fig. 2B). Similar IgG and IgM responses  
292 were also detected against heat-killed bacteria (Fig. S1). When we compared IgG subtypes, we  
293 found that LEPS and PCV13 triggered similar class switching to predominantly the IgG3 and  
294 IgG2b subtypes (Fig. 2C-F). Overall, these findings confirm that the LEPS vaccine is  
295 immunogenic in young hosts and elicits antibody production comparable to PCV13.

### 296 **3.2 The LEPS vaccine is immunogenic in aged hosts**

297 Aging is accompanied by immunosenescence which is known to blunt immune responses  
298 to vaccines (40-42). Given our positive results when using young mice, we next tested if the LEPS  
299 vaccine could similarly prompt an immunogenic response in aged hosts. Thus, old (18-22 months)  
300 C57BL/6 mice were immunized with the same vaccine formulations used in young mice (Fig. 1B)  
301 and antibody levels against purified polysaccharide were measured. Similar to what we observed  
302 in young mice, we found that LEPS vaccination of old mice elicited IgM and IgG production  
303 comparable to that of PCV13 (Fig 3A and B). Further, LEPS and PCV13 also induced class  
304 switching to predominantly IgG2b and IgG3 in old mice (Fig 3C-F). Overall, these data indicate  
305 that the LEPS vaccination is immunogenic in old mice and the antibody response mounted to  
306 LEPS by aged hosts is comparable to that observed in young controls.

### 307 **3.3 LEPS vaccination elicits enhanced serum neutralizing activity against *S. pneumoniae*** 308 **in aged hosts**

309 Apart from antibody levels, antibody function is crucial for vaccine efficacy (43). We  
310 therefore wanted to assess antibody function following LEPS vaccination. Binding of *S.*

311 *pneumoniae* to the airway epithelium is an important step that is crucial for host colonization and  
312 infection (2, 4, 38, 44). As such, we tested the ability of antibodies induced by the LEPS vaccine  
313 to neutralize bacterial binding to H292 cells (type I and II pneumocytes), a human lung epithelial  
314 cell line extensively used to study host-pathogen interactions (38, 39, 45, 46). To do so, we  
315 compared the ability of sera collected four weeks post-vaccination across the different  
316 immunization groups (Fig. 1B) to block bacterial binding relative to the Sham control group (Fig.  
317 1B). We found that in young mice, sera from both the PCV13 and LEPS vaccinated groups  
318 significantly reduced the binding of a *S. pneumoniae* serotype 4 strain (serotype covered by both  
319 vaccines) to H292 cells by 25% (Fig. 4A). Importantly, sera from the LEPS group caused a  
320 significant 2-fold reduction in bacterial binding compared to the Empty LEPS control (Fig 4A). The  
321 effects observed were not due to the direct bactericidal activity of the sera as all binding is  
322 calculated with respect bacteria incubated with sera alone for each opsonization condition (see  
323 Materials and Methods). These data suggest that antibodies induced by both PCV13 and LEPS  
324 in the young mice are capable of neutralizing bacterial adherence to host cells.

325         The function of antibodies is known to decline with age (47). In fact, when we measured  
326 the ability of sera isolated from old mice to neutralize bacterial binding, we found that unlike what  
327 we observed in young hosts, sera from old mice vaccinated with PCV13 had no effect on  
328 pneumococcal binding to H292 cells compared to the sham group (Fig. 4B). Interestingly, when  
329 *S. pneumoniae* was opsonized with sera from old LEPS vaccinated mice, there was a significant  
330 40% and 25% reduction in bacterial binding compared to the Sham and Empty LEPS controls,  
331 respectively (Fig. 4B). This finding suggests that compared to PCV13, LEPS vaccination induces  
332 antibodies that are better at neutralizing bacterial binding to the pulmonary epithelium.

333 **3.4 LEPS vaccination elicits enhanced serum opsonic activity against *S. pneumoniae* in**  
334 **aged hosts**

335           The opsonic capacity of antibodies is an important correlate of vaccine protectiveness  
336 (48). We therefore measured the ability of sera isolated at four weeks post-immunization across  
337 the different groups (Fig. 1B) to induce opsonophagocytic (OPH) killing of a *S. pneumoniae*  
338 serotype 4 strain (serotype covered by both vaccines) by primary PMNs from naïve mice, using  
339 assays we had previously established (31). We found that in young hosts, compared to the control  
340 groups, we saw a significant increase in pneumococcal killing by PMNs when the bacteria were  
341 opsonized with sera from PCV13 or the LEPS vaccinated groups, with higher opsonophagocytic  
342 killing induced by the latter (Fig 5A). This suggests that the opsonic activity of sera induced by  
343 LEPS immunization matched or exceeded that elicited by PCV13.

344           We then compared the opsonic activity of sera from old mice. As PMNs function is known  
345 to decline with age and can confound the interpretation of the data (35, 49), we first measured  
346 the ability of sera isolated from old mice to elicit opsonophagocytic bacterial killing by PMNs  
347 isolated from young mice. We found that while sera from PCV13 immunized old mice failed to  
348 significantly improve bacterial killing by PMNs relative to Sham controls (Fig 5B), sera from LEPS  
349 vaccinated old mice elicited significantly higher opsonophagocytic killing by PMNs than both  
350 controls as well as the PCV13 group (Fig 5B). To best mimic *in vivo* conditions, we then age  
351 matched the sera and PMNs and measured the ability of sera from old hosts to induce bacterial  
352 killing by PMNs from old mice. As expected (35), sera from the control groups (Sham and Empty  
353 LEPS) failed to elicit opsonophagocytic bacterial killing by PMNs from old mice (Fig. 3C).  
354 Surprisingly, when PMNs were challenged with *S. pneumoniae* opsonized with PCV13 sera from  
355 old mice, we failed to see bacterial killing and in fact observed bacterial growth in the presence of  
356 PMNs (Fig 5B). In contrast, we saw a significant 10-fold increase in bacterial killing by PMNs in  
357 comparison to the control groups when sera from the LEPS vaccinated old mice were used to  
358 opsonize *S. pneumoniae* (Fig. 5B). Further, PMN-mediated bacterial killing induced by sera from  
359 the LEPS group was significantly higher than that seen with sera from the PCV13 group (Fig 5B).

360 These findings suggest that compared to PCV13, LEPS vaccination induces antibodies that are  
361 better at eliciting opsonophagocytic bacterial killing by immune cells.

### 362 **3.5 Young mice immunized with the LEPS vaccine show resistance to invasive** 363 **pneumococcal infection**

364 We next wanted to test whether the LEPS vaccination confers host protection against  
365 pneumococcal infection. *S. pneumoniae* strains can vary (50) and most infections result in  
366 primarily pneumonia, but up to 30% of patients with pneumococcal pneumonia also develop  
367 bacteremia and have worse prognosis (51). Thus, we first tested host protection against invasive  
368 infection using the well-characterized serotype 4 clinical isolate *S. pneumoniae* TIGR4 as a model  
369 of pneumonia that results in bacteremia (52, 53).

370 At week 4 following vaccination (Fig. 1B), young (2-3 months) C57BL/6 mice were infected  
371 with  $5 \times 10^5$  CFU of *S. pneumoniae* TIGR4 intra-tracheally (*i.t.*) and assessed for clinical scores  
372 and bacteremia 24 hr post-infection and overall survival over a period of 2 weeks. We found that  
373 compared to the Sham group, vaccination of mice with LEPS significantly reduced the disease  
374 severity associated with pneumococcal disease (Fig. 6A). Importantly, this reduction in disease  
375 severity was comparable with that observed in mice vaccinated with PCV13 (Fig. 6A). When we  
376 compared bacteremia across different mice groups, both the LEPS and PCV13 vaccine  
377 significantly reduced the bacterial burden in the blood (by approximately 1,000-fold) compared to  
378 the Sham group (Fig. 6B). The reduction in blood bacterial burden seen with the LEPS formulation  
379 was also significantly lower than the Empty LEPS group (Fig. 6B). Interestingly, the PCV13  
380 vaccinated group had significantly higher incidence of bacteremia ( $p=0.002$  by Fisher's exact  
381 test), where approximately 29% of mice became bacteremic compared to 0% of mice in the LEPS  
382 vaccinated group (Fig. 6B). When we tracked overall survival, we found that all the mice from the  
383 Sham group succumbed to pneumococcal infection within 48 hrs of infection (Fig. 6C). Mice from  
384 the Empty LEPS group showed similar kinetics with more than 50% having died within 48 hrs of

385 challenge with *S. pneumoniae* with only 14% survival (1/7) by the end of the 2-week observation  
386 period (Fig. 6C). Vaccination with PCV13 significantly improved the survival rate of mice with only  
387 25% of mice succumbing to infection (Fig. 6C). Strikingly, mice immunized with LEPS showed  
388 100% survival (Fig. 6C), mirroring the effect of this vaccination on clinical score (Fig. 6A) and  
389 bacteremia (Fig. 6B). Overall, these findings highlight the high efficacy of the LEPS vaccine in  
390 preventing invasive pneumococcal infection.

### 391 **3.6 LEPS vaccination protects old hosts against invasive pneumococcal infection**

392 We next compared the ability of the LEPS and PCV13 vaccines in protecting aged hosts  
393 against invasive pneumococcal infection. Four weeks following vaccination (Fig. 1B), old (18-22  
394 months) mice were infected with  $5 \times 10^5$  CFU of *S. pneumoniae* TIGR4 intra-tracheally (*i.t.*) and  
395 assessed for clinical scores and bacteremia 24 hr post-infection and survival over time. Mice  
396 belonging to both the control groups (Sham and Empty LEPS) showed severe signs of clinical  
397 disease (Fig. 7A). Although vaccination with PCV13 mitigated the overall clinical severity of  
398 disease to some extent, half of the mice from this group still experienced clinical symptoms  
399 (indicated by high clinical scores) (Fig. 7A). However, mice immunized with LEPS showed no  
400 clinical symptoms at 24 hr post-infection (Fig. 7A). When we compared bacteremia at 24 hr post-  
401 infection, we found that mice from both control groups (Sham and Empty LEPS) had a high blood  
402 bacterial burden with 100% incidence of bacteremia (Fig. 7B). Compared to the young  
403 counterparts (Fig. 6B), aged-mice experienced 100-fold higher bacterial burden in the circulation,  
404 displaying the expected age-associated susceptibility to *S. pneumoniae* infection (35, 54).  
405 Although vaccination of old mice with PCV13 significantly reduced the bacterial burden in blood  
406 compared to the Sham group, 80% of the animals still became bacteremic (Fig. 7B). Interestingly,  
407 mice immunized with LEPS had more than 1,000-fold reduction in blood bacterial numbers (Fig.  
408 7B) compared to both control groups. Importantly, protection against bacteremia elicited by LEPS  
409 was significantly better than PCV13 as the LEPS group had a 100-fold lower bacterial burden in



410 the blood and a lower incidence of bacteremia ( $p=0.0055$  by Fisher's exact test) where only 11%  
411 of mice became bacteremic (Fig. 7B). When we compared survival, we found that mice in both  
412 the control groups succumbed to pneumococcal infection within 24 hrs of infection (Fig. 7C).  
413 Interestingly, PCV13 failed to fully protect old mice, where we observed only 25% of animals  
414 surviving the course of infection, albeit being significantly higher than survival observed in the  
415 Sham group (Fig. 7C). In contrast, we found that the majority of mice immunized with LEPS (75%)  
416 survived the infection which was not only higher than both control groups but also significantly  
417 higher than the survival of the PCV13 group (Fig. 7C). These data indicate that while PCV13 fails  
418 to protect aged hosts, the LEPS vaccine significantly reversed the age-related susceptibility to  
419 invasive pneumococcal infection.

### 420 **3.7 LEPS vaccination protects old hosts against pneumococcal pneumonia**

421 The efficacy of pneumococcal vaccines, particularly against pneumonia, decline with  
422 aging (18, 42). Therefore, we wanted to test the protective capacity of the LEPS vaccine against  
423 non-bacteremic pneumonia in aged hosts. To do so, we used a *S. pneumoniae* serotype 19F  
424 strain that is less invasive and covered by PCV13 (55). C57BL/6 old (18-22 months) mice were  
425 injected *i.m.* with the LEPS vaccine containing serotype 19F capsular polysaccharide antigen,  
426 PCV13, or the Sham control (Fig. 1B). At week 4 post immunization (Fig. 1B), mice were infected  
427 (*i.t.*) with  $2 \times 10^7$  CFU of *S. pneumoniae* 19F and assessed for clinical severity of disease and  
428 bacterial burden in the lung 24 hr post-infection. Interestingly, mice vaccinated with PCV13  
429 showed worsening of clinical scores similar to that of the Sham group (Fig. 8A). In contrast, LEPS  
430 immunized mice showed an overall significantly reduced clinical score compared to both the  
431 Sham control and PCV13 groups (Fig. 8A). When we measured the lung bacterial burden, we  
432 observed a similar trend, with PCV13 failing to reduce the bacterial numbers compared to the  
433 Sham group (Fig. 8B), while mice that received the LEPS vaccine had approximately 10-fold less  
434 bacterial burden in the lungs compared to the Sham controls (Fig. 8B). Overall, these findings

435 indicate that while vaccination with PCV13 failed to provide any protection in old mice against  
436 pneumococcal pneumonia, the LEPS vaccine boosted the ability of aged hosts to control lung  
437 infection.

438

#### 439 **4. Discussion**

440 The current study began with the assessment of the LEPS platform in young mice to first  
441 establish protocols and confirm prior success before shifting to aged hosts. Our findings (Figs. 2,  
442 4-6) support that the LEPS approach is a viable vaccine strategy against *S. pneumoniae* when  
443 compared to prior studies from our working group (24, 25). Though in this case, we note two  
444 differences to previous efforts. First, we use a different species of mice (C57BL/6 in this study vs.  
445 CD-1 mice in prior work). This is relevant as it suggests that the LEPS vaccine platform is effective  
446 across different mouse strains with varying genetic backgrounds, supporting future translational  
447 efforts across a diverse human population. Second, in the current study, we used the virulent-  
448 specific pneumococcus antigen PncO as an effective replacement for CRM197 in comparisons  
449 of the LEPS formulation to PCV13. Here, PncO appears to serve a very similar role to CRM197  
450 (i.e., an immunogenic carrier protein) in promoting LEPS vaccine effectiveness both in terms of  
451 inducing a functional antibody response (Figs. 2, 4 and 5) as well as host protection against  
452 invasive pneumococcal disease (Fig. 6). Similar to prior studies (24, 25), we observed isotype  
453 switching to IgG upon vaccination with the modified LEPS that was comparable to Pevnar-13,  
454 indicating that PncO matches CRM197 in the capability to induce a T-cell dependent response  
455 (24). Since PncO serves another crucial purpose in the overall LEPS design (as discussed below),  
456 the refined formulation presented here which eliminates the need for CRM197 offers a more  
457 economical vaccine strategy against pneumococcal infections.

458 As pneumococcal disease has a disproportional impact upon the elderly, success of the  
459 LEPS platform in young mice, both within the current study and as reported previously (24, 25),

460 thus prompted efforts with aged mice. However, a significant unknown was whether the LEPS  
461 platform would perform within aged hosts as the efficacy of vaccines is known to decline with  
462 aging (40, 41). PPSV is traditionally recommended for the elderly while PCV is recommended for  
463 the most vulnerable elderly with underlying conditions (56). Yet, aging leads to defects in T cell-  
464 dependent and -independent antibody production (57, 58), limiting the efficacy of both vaccines  
465 (56, 57, 59). This was recapitulated in this study where Pevnar-13 vaccination of old mice induced  
466 antibodies with subpar function (Figs. 4 and 5) resulting in reduced protection against infection  
467 (Figs. 6 and 7) as compared to young controls. In contrast, the LEPS vaccine was equally effective  
468 across host age (Figs. 6 and 7). LEPS immunization of old mice resulted in comparable antibody  
469 levels to Pevnar-13 (Fig. 3) but improved antibody function (Figs. 4 and 5). This translated to  
470 improved protection against pneumococcal infection (Figs. 7 and 8) relative to Pevnar-13.  
471 Importantly, LEPS immunization protected old mice (clinical score, bacteremia, and overall  
472 survival- Figs. 7 and 8) to a similar degree as it did young mice, suggesting that the LEPS platform  
473 is able to overcome the age-driven decline in immune responses. The detailed mechanisms by  
474 which LEPS (and its myriad of formulation variables) boosts antibody responses in aged hosts  
475 and whether it is directly activating B and/or T cells or acting as an adjuvant to boost antigen  
476 uptake and presentation by antigen presenting cells is an avenue for future studies.

477 An important finding here is that the LEPS platform not only provided protection against  
478 invasive pneumococcal disease (Fig. 7) but also against pneumococcal pneumonia (Fig. 8). This  
479 is of high clinical relevance as one of the limitations of licensed pneumococcal vaccines is their  
480 reduced efficacy against pneumonia in the elderly (60, 61). This is largely driven by the fact that  
481 current polysaccharide vaccines fail to account for bacterial disease progression. *S. pneumoniae*  
482 typically reside as a commensal biofilm within the human nasopharynx and asymptomatic  
483 colonization is thought to be a prerequisite of disease (16, 62). The transition from benign  
484 colonizer to lethal pulmonary or systemic pathogen involves changes in transcription profiles and

485 bacterial phenotype (22), including changes to the surface polysaccharide capsule, which is the  
486 target of current vaccines. The LEPS vaccine is built specifically to address this weakness in  
487 current vaccine options that only focus on polysaccharide immunogens as the LEPS vehicle also  
488 includes PncO (25, 63, 64), an *S. pneumoniae* surface protein antigen (conserved across  
489 serotypes) over-represented on those virulent pneumococci that break free of the asymptomatic  
490 nasopharynx biofilm, disseminate to other bodily locations (lung, blood), and promote disease.  
491 We have yet to fully assess the functionality of the associated PncO protein in aged hosts. As this  
492 protein antigen becomes critical during later stages of pneumococcal disease, including those  
493 prompted by viral co-infection, we anticipate its relevance to emerge in secondary bacterial  
494 pneumoniae studies spurred by viral exposure in aged mice. We intend to pursue such studies in  
495 the future and, as warranted, further refine the protein antigen content of LEPS based on *S.*  
496 *pneumoniae* antigens that are specifically upregulated during infection of aged hosts.

497 In summary, this study establishes the use of the LEPS platform as a viable, effective, and  
498 economical vaccine strategy against pneumococcal infection in aged hosts. Many features of  
499 LEPS can be readily adjusted, including polysaccharide coverage and content level, the  
500 noncovalent attachment mechanism of the associated protein, and the base lipid composition. As  
501 such, we expect future optimization of the LEPS formulation to further build upon the results  
502 obtained in this work. The protein component of LEPS, in particular, holds extended potential as  
503 several protein antigens can be combined into one LEPS system for a multiplier effect in valency  
504 and for serotype-independent protection. As the elderly are projected to reach two billion  
505 worldwide by 2050 (12), the LEPS platform provides a timely intervention against serious  
506 pneumococcal infections that can be easily adapted to target other respiratory-tract pathogens  
507 that infect this vulnerable population.

508

509 **5. Conflict of interest**

510 BAP is associated with Abcombi Biosciences, a company focused on vaccine design. No  
511 funding was provided by Abcombi Biosciences in the completion of the enclosed work.

512

## 513 **6. Author contributions**

514 MB conducted the research, analyzed data, and wrote the paper. RN conducted research and  
515 analyzed data. EYIT, DP, AA, and SRS conducted research. BAP and ENBG designed and  
516 supervised the research and wrote and edited the paper. All authors read and approved the final  
517 manuscript.

518

## 519 **7. Funding**

520 This research was funded by the National Institutes of Aging grant number AG064215 to ENBG  
521 and BAP. This work was also supported by American Heart Association Grant number 827322  
522 to MB.

523

## 524 **8. Acknowledgements**

525 We would like to acknowledge Sydney Herring for critical reading and discussion of the  
526 manuscript.

527

## 528 **Figure Legends**

529 **Figure 1. Vaccine design and experimental set-up.** (A) LEPS design. The LEPS vaccine  
530 consists of the liposomal carrier encapsulating bacterial polysaccharide with PnCO linked to the  
531 surface. (B) Vaccination timeline. Mice were mock treated with 50  $\mu$ L PBS (Sham), empty LEPS  
532 with alum (Empty LEPS), or administered either the pneumococcal conjugate vaccine Prevnar 13  
533 (PCV13) or the LEPS vaccine containing bacterial polysaccharide in addition to PnCO and alum  
534 (LEPS) via intramuscular (*i.m.*) injections to the hind legs. Two weeks following the initial  
535 vaccination, the LEPS and Empty LEPS groups received a booster dose. Sera were collected at

536 baseline and two and four weeks with respect to the initial vaccination to assess antibody levels  
537 and function. Four weeks following vaccination mice were challenged intra-tracheally (*i.t*) with *S.*  
538 *pneumoniae* and monitored for bacterial burden and clinical signs of disease.

539 **Figure 2. The LEPS vaccine and Prevnar-13 induce comparable levels of antibodies against**  
540 **pneumococcal polysaccharides in young hosts.** Young C57BL/6 mice (2-months) were  
541 injected *i.m.* with LEPS containing serotype 4 capsular polysaccharide antigen, PCV13, or the  
542 controls (Sham or Empty LEPS vector) following the timeline in Fig. 1B. Total levels of IgM (A),  
543 IgG (B), and IgG subtypes including IgG1 (C), IgG2b (D), IgG2c (E) and IgG3 (F) against purified  
544 polysaccharide serotype 4 in the sera were measured over time by ELISA. *p* values were  
545 determined by one-way ANOVA followed by Tukey's test. Asterisks (\*, *p*<0.05) denote significant  
546 differences between the indicated group and the empty LEPS group. Data shown are presented  
547 as mean ± CI and are pooled from 3 separate experiments with n= 10 mice for Empty LEPS, n=10  
548 mice for LEPS, and n=15 mice for the PCV13 groups.

549 **Figure 3. The LEPS vaccine and Prevnar-13 induce comparable levels of antibodies against**  
550 **pneumococcal polysaccharide in old hosts.** Old C57BL/6 mice (18-22 months) were injected  
551 *i.m.* with LEPS containing serotype 4 capsular polysaccharide antigen, PCV13, or the controls  
552 (Sham or Empty LEPS vector) following the timeline in Fig. 1B. Total levels of IgM (A), IgG (B),  
553 and IgG subtypes including IgG1 (C), IgG2b (D), IgG2c (E) and IgG3 (F) against purified  
554 polysaccharide serotype 4 in the sera were measured over time by ELISA. *p* values were  
555 determined by one-way ANOVA followed by Tukey's test. Asterisks (\*, *p*<0.05) indicate significant  
556 differences between the indicated group and the empty LEPS group. Data shown are presented  
557 as mean ± CI and are pooled from 3 separate experiments with n= 5 mice for Empty LEPS, n=10  
558 mice for LEPS, and n=10 mice for the PCV13 groups.

559 **Figure 4. Sera from old mice vaccinated with LEPS, but not Prevnar-13, neutralize the**  
560 **ability of *S. pneumoniae* to bind pulmonary epithelial cells.** Sera were collected from mice

561 immunized with LEPS containing serotype 4 capsular polysaccharide antigen, PCV13, or the  
562 controls (Sham or Empty LEPS vector) at four weeks post vaccination following the timeline  
563 indicated in Fig. 1B. The ability of sera to neutralize bacterial binding to pulmonary epithelial cells  
564 was determined. *S. pneumoniae* serotype 4 TIGR4 strain was pre-opsonized for 45 minutes with  
565 10% sera from young (Y) (A) or old (O) (B) mice and used to infect H292 cells for 1 hour at a MOI  
566 of 10. The number of bound bacteria was determined by plating on blood agar plates and the  
567 percent bacterial binding calculated with respect to bacteria incubated with sera alone for each  
568 opsonization condition. The effect of sera on bacterial binding was then determined relative to the  
569 Sham group. Asterisks (\*) indicate significant differences with respect to the Sham group and  
570 hash signs (#) indicate significant differences between the indicated groups as calculated by one-  
571 way ANOVA followed by Tukey's test. Data shown are pooled from four separate experiments  
572 where each condition was tested in quadruplicate and presented as mean  $\pm$  SD.

573 **Figure 5. LEPS vaccination of old mice induces sera with better opsonic activity compared**  
574 **to Prevnar-13 vaccination.** Sera were collected from young (Y) or old (O) mice immunized with  
575 LEPS containing serotype 4 capsular polysaccharide antigen, PCV13, or the controls (Sham or  
576 Empty LEPS vector) at four weeks post vaccination following the timeline indicated in Fig. 1B.  
577 The ability of sera to induce opsonophagocytic killing of bacteria by PMNs was determined. PMNs  
578 were isolated from the bone marrow of naïve young (2 months) (A and B) or old (18-22 month)  
579 (C) C57BL/6 mice and mixed for 45 min at 37°C with *S. pneumoniae* serotype 4 TIGR4 strain pre-  
580 opsonized with 3% sera from the indicated groups. Reactions were stopped on ice, and viable  
581 CFU were determined after serial dilution and plating. The percentage of bacteria killed was  
582 determined with respect to a no PMN control for each condition. Asterisks (\*) indicate significant  
583 differences with respect to the Sham group (ns: not significant) and hash signs (#) indicate  
584 significant differences between the indicated groups as calculated by one-way ANOVA followed  
585 by Tukey's test. Data shown are pooled from three separate experiments (n=3 biological

586 replicates or mice per group) where each condition was tested in triplicate (n=3 technical  
587 replicates) per experiment and presented as mean  $\pm$  SD.

588 **Figure 6. LEPS vaccination confers similar protection to Prevnar13 in young mice against**  
589 **invasive pneumococcal infection.** Young (2-3 months) C57BL/6 mice were immunized with  
590 LEPS containing serotype 4 capsular polysaccharide antigen, PCV13, or the controls (Sham or  
591 Empty LEPS vector). Four weeks later (timeline presented in Fig. 1B), mice were infected *i.t* with  
592  $5 \times 10^5$  CFU of *S. pneumoniae* TIGR4 strain. Clinical scores (A) and bacterial numbers in the  
593 blood along with the incidence of bacteremia (% noted above each group) (B) were determined  
594 24 hr post-infection. Survival was also followed over time (C). (A-B) Asterisks (\*) indicate  
595 significant differences with respect to the Sham group, and hash signs (#) indicate significant  
596 differences between the indicated groups as calculated by one-way ANOVA followed by Tukey's  
597 test. Pooled data are presented as mean  $\pm$  SD and each dot represents one mouse. (C) Asterisks  
598 (\*) indicate significant differences with respect to the Sham group, and hash signs (#) indicate  
599 significant differences between the indicated groups as determined by the log-rank (Mantel-Cox)  
600 test. Fractions denote surviving mice. Pooled data from two separate experiments with n=13 mice  
601 in the Sham group, n=7 mice in the Empty LEPS group, n=14 mice in the PCV13 group, and n=10  
602 mice in the LEPS group are shown. LOD: limit of detection.

603 **Figure 7. LEPS vaccination protects old mice against invasive pneumococcal infection.**  
604 Old (18-22 months) C57BL/6 mice were immunized with LEPS containing serotype 4 capsular  
605 polysaccharide antigen, PCV13, or the controls (Sham or Empty LEPS vector). Four weeks later  
606 (timeline presented in Fig. 1B), mice were infected intra-tracheally with  $5 \times 10^5$  CFU of *S.*  
607 *pneumoniae* serotype 4 TIGR4 strain. Clinical scores (A) and bacterial numbers in the blood along  
608 with the incidence (% noted above each group) of bacteremia (B) were determined 24 hr post-  
609 infection. Survival was also followed over time (C). (A-B) Asterisks (\*) indicate significant  
610 differences with respect to the Sham group, and hash signs (#) indicate significant differences



611 between the indicated groups as calculated by one-way ANOVA followed by Tukey's test. Pooled  
612 data are presented as mean  $\pm$  SD and each dot represents one mouse. (C) Asterisks (\*) indicate  
613 significant differences with respect to the Sham group (ns: not significant), and hash signs (#)  
614 indicate significant differences between the indicated groups as determined by the log-rank  
615 (Mantel-Cox) test. Fractions denote surviving mice. Pooled data from two separate experiments  
616 with n=10 mice in the Sham group, n=5 mice in the Empty LEPS group, n=12 mice in the PCV13  
617 group, and n=9 mice in the LEPS group are shown. LOD: limit of detection.

618 **Figure 8. LEPS vaccination protects old mice against pneumococcal pneumonia.** Old (18-  
619 22 months) C57BL/6 mice were immunized with LEPS containing serotype 19F capsular  
620 polysaccharide antigen, PCV13, or the controls (Sham or Empty LEPS vector). Following the  
621 timeline presented in Fig. 1B, 4 weeks after vaccination, mice were infected *i.t* with  $2 \times 10^7$  CFU  
622 of *S. pneumoniae* serotype 19F. Clinical scores (A) and bacterial burden in the lungs (B) were  
623 determined 24 hr post-infection. (A) Percentage of mice that displayed clinical signs of pneumonia  
624 are in parentheses. (A-B) Asterisks (\*) indicate significant differences between the indicated  
625 groups as determined by one-way ANOVA followed by Tukey's test. Data shown are pooled from  
626 n= 5 mice per group and presented as mean  $\pm$  SD. Each dot represents one mouse. LOD: limit  
627 of detection.

## 628 **Supplemental Materials**

629 **Figure S1. LEPS and Pevnar-13 vaccination induce comparable antibody production**  
630 **against *S. pneumoniae*.** C57BL/6 young (2 months) and old (18-22 months) mice were injected  
631 *i.m.* with LEPS containing serotype 4 capsular polysaccharide antigen, PCV13, or the controls  
632 (Sham or Empty LEPS vector) following the timeline presented in Fig.1B. Levels of IgM and IgG  
633 in the sera against heat killed (HKB) *S. pneumoniae* TIGR4 were measured by ELISA. Antibody  
634 units were determined based on a hyperimmune standard included in each ELISA plate. Data  
635 shown are presented as the mean  $\pm$  CI and are pooled from 3 separate experiments. For the

636 young groups (A-B), data from n=10 mice for Empty LEPS, n=10 mice for LEPS, and n=15 mice  
637 for PCV13 are pooled. For the old groups (C-D), data from n= 5 mice for Empty LEPS, n=10 mice  
638 for LEPS, and n=10 mice for PCV13 are pooled.

639

640 **References:**

- 641 1. Estimates of the global, regional, and national morbidity, mortality, and aetiologies of lower  
642 respiratory infections in 195 countries, 1990-2016: a systematic analysis for the Global Burden of  
643 Disease Study 2016. *Lancet Infect Dis.* 2018;18(11):1191-210.
- 644 2. Kadioglu A, Weiser JN, Paton JC, Andrew PW. The role of *Streptococcus pneumoniae*  
645 virulence factors in host respiratory colonization and disease. *Nat Rev Microbiol.* 2008;6(4):288-  
646 301.
- 647 3. Randle E, Ninis N, Inwald D. Invasive pneumococcal disease. *Archives of disease in*  
648 *childhood - Education & practice edition.* 2011;96(5):183-90.
- 649 4. van der Poll T, Opal SM. Pathogenesis, treatment, and prevention of pneumococcal  
650 pneumonia. *Lancet.* 2009;374(9700):1543-56.
- 651 5. Weycker D, Farkouh RA, Strutton DR, Edelsberg J, Shea KM, Pelton SI. Rates and costs  
652 of invasive pneumococcal disease and pneumonia in persons with underlying medical conditions.  
653 *BMC Health Serv Res.* 2016;16:182-.
- 654 6. Huang SS, Johnson KM, Ray GT, Wroe P, Lieu TA, Moore MR, et al. Healthcare utilization  
655 and cost of pneumococcal disease in the United States. *Vaccine.* 2011;29(18):3398-412.
- 656 7. Chong CP, Street PR. Pneumonia in the elderly: a review of the epidemiology,  
657 pathogenesis, microbiology, and clinical features. *South Med J.* 2008;101(11):1141-5; quiz 32,  
658 79.
- 659 8. Henig O, Kaye KS. Bacterial Pneumonia in Older Adults. *Infect Dis Clin North Am.*  
660 2017;31(4):689-713.

- 661 9. Wroe PC, Finkelstein JA, Ray GT, Linder JA, Johnson KM, Rifas-Shiman S, et al. Aging  
662 population and future burden of pneumococcal pneumonia in the United States. *J Infect Dis.*  
663 2012;205(10):1589-92.
- 664 10. Janssens JP, Krause KH. Pneumonia in the very old. *Lancet Infect Dis.* 2004;4(2):112-24.
- 665 11. CDC. Centers for Disease Control and Prevention. Active Bacterial Core Surveillance  
666 Report, Emerging Infections Program Network, *Streptococcus pneumoniae*. 2017.
- 667 12. Boe DM, Boule LA, Kovacs EJ. Innate immune responses in the ageing lung. *Clin Exp*  
668 *Immunol.* 2017;187(1):16-25.
- 669 13. <https://www.cdc.gov/pneumococcal/about/facts.html>. CfDPaCAf. [Available from:  
670 <https://www.cdc.gov/pneumococcal/about/facts.html>.
- 671 14. <http://www.cdc.gov/drugresistance/pdf/ar-threats-2013-508.pdf>. CENTERS FOR  
672 DISEASE CONTROL AND PREVENTION; 2013 [Available from:  
673 <http://www.cdc.gov/drugresistance/pdf/ar-threats-2013-508.pdf>.
- 674 15. Ganaie F, Saad Jamil S, McGee L, van Tonder Andries J, Bentley Stephen D, Lo  
675 Stephanie W, et al. A New Pneumococcal Capsule Type, 10D, is the 100th Serotype and Has a  
676 Large cps Fragment from an Oral *Streptococcus*. *mBio.*11(3):e00937-20.
- 677 16. Weiser JN, Ferreira DM, Paton JC. *Streptococcus pneumoniae*: transmission, colonization  
678 and invasion. *Nat Rev Microbiol.* 2018;16(6):355-67.
- 679 17. Obaro S, Adegbola R. The pneumococcus: carriage, disease and conjugate vaccines. *J*  
680 *Med Microbiol.* 2002;51(2):98-104.
- 681 18. Bonten MJ, Huijts SM, Bolkenbaas M, Webber C, Patterson S, Gault S, et al.  
682 Polysaccharide conjugate vaccine against pneumococcal pneumonia in adults. *N Engl J Med.*  
683 2015;372(12):1114-25.
- 684 19. Hanage WP. Serotype-specific problems associated with pneumococcal conjugate  
685 vaccination. *Future Microbiol.* 2008;3(1):23-30.

- 686 20. Berical AC, Harris D, Dela Cruz CS, Possick JD. Pneumococcal Vaccination Strategies.  
687 An Update and Perspective. *Ann Am Thorac Soc.* 2016;13(6):933-44.
- 688 21. Marks LR, Parameswaran GI, Hakansson AP. Pneumococcal interactions with epithelial  
689 cells are crucial for optimal biofilm formation and colonization in vitro and in vivo. *Infect Immun.*  
690 2012;80(8):2744-60.
- 691 22. D'Mello A, Riegler AN, Martínez E, Beno SM, Ricketts TD, Foxman EF, et al. An in vivo  
692 atlas of host-pathogen transcriptomes during *Streptococcus pneumoniae* colonization and  
693 disease. *Proc Natl Acad Sci U S A.* 2020;117(52):33507-18.
- 694 23. Keller Lance E, Robinson DA, McDaniel Larry S, Camilli A, Collier RJ. Nonencapsulated  
695 *Streptococcus pneumoniae*: Emergence and Pathogenesis. *mBio.*7(2):e01792-15.
- 696 24. Jones CH, Zhang G, Nayerhoda R, Beitelshes M, Hill A, Rostami P, et al. Comprehensive  
697 vaccine design for commensal disease progression. *Sci Adv.* 2017;3(10):e1701797.
- 698 25. Hill AB, Beitelshes M, Nayerhoda R, Pfeifer BA, Jones CH. Engineering a Next-  
699 Generation Glycoconjugate-Like *Streptococcus pneumoniae* Vaccine. *ACS Infect Dis.* 2018.
- 700 26. Simell B, Vuorela A, Ekstrom N, Palmu A, Reunanen A, Meri S, et al. Aging reduces the  
701 functionality of anti-pneumococcal antibodies and the killing of *Streptococcus pneumoniae* by  
702 neutrophil phagocytosis. *Vaccine.* 2011;29(10):1929-34.
- 703 27. Jackson LA, Gurtman A, van Cleeff M, Frenck RW, Treanor J, Jansen KU, et al. Influence  
704 of initial vaccination with 13-valent pneumococcal conjugate vaccine or 23-valent pneumococcal  
705 polysaccharide vaccine on anti-pneumococcal responses following subsequent pneumococcal  
706 vaccination in adults 50 years and older. *Vaccine.* 2013;31(35):3594-602.
- 707 28. Nayerhoda R, Hill A, Beitelshes M, Jones C, Pfeifer B. Design Variation of a Dual-Antigen  
708 Liposomal Vaccine Carrier System. *Materials (Basel).* 2019;12(17).
- 709 29. Nayerhoda R, Hill A, Pfeifer BA. Liposomal Dual Delivery of Both Polysaccharide and  
710 Protein Antigens. *Methods Mol Biol.* 2021;2183:477-87.

- 711 30. Tchalla EYI, Bhalla M, Wohlfert EA, Bou Ghanem EN. Neutrophils are required during  
712 immunization with the pneumococcal conjugate vaccine for protective antibody responses and  
713 host defense against infection. *J Infect Dis.* 2020.
- 714 31. Bhalla M, Simmons SR, Tchalla EYI, Bou Ghanem EN. Testing Anti-Pneumococcal  
715 Antibody Function Using Bacteria and Primary Neutrophils. *Methods Mol Biol.* 2021;2183:559-74.
- 716 32. Bou Ghanem EN, Maung NHT, Siwapornchai N, Goodwin AE, Clark S, Munoz-Elias EJ,  
717 et al. Nasopharyngeal Exposure to *Streptococcus pneumoniae* Induces Extended Age-  
718 Dependent Protection against Pulmonary Infection Mediated by Antibodies and CD138(+) Cells.  
719 *J Immunol.* 2018;200(11):3739-51.
- 720 33. Swamydas M, Lionakis MS. Isolation, purification and labeling of mouse bone marrow  
721 neutrophils for functional studies and adoptive transfer experiments. *J Vis Exp.* 2013(77):e50586.
- 722 34. Bhalla M, Heinzinger LR, Morenikeji OB, Marzullo B, Thomas BN, Bou Ghanem EN.  
723 Transcriptome profiling reveals CD73 and age-driven changes in neutrophil responses against  
724 *Streptococcus pneumoniae*. *Infect Immun.* 2021:lai0025821.
- 725 35. Bhalla M, Simmons SR, Abamonte A, Herring SE, Roggensack SE, Bou Ghanem EN.  
726 Extracellular adenosine signaling reverses the age-driven decline in the ability of neutrophils to  
727 kill *Streptococcus pneumoniae*. *Aging Cell.* 2020:e13218.
- 728 36. Siwapornchai N, Lee JN, Tchalla EYI, Bhalla M, Yeoh JH, Roggensack SE, et al.  
729 Extracellular adenosine enhances the ability of PMNs to kill *Streptococcus pneumoniae* by  
730 inhibiting IL-10 production. *J Leukoc Biol.* 2020.
- 731 37. Standish AJ, Weiser JN. Human neutrophils kill *Streptococcus pneumoniae* via serine  
732 proteases. *J Immunol.* 2009;183(4):2602-9.
- 733 38. Bhalla M, Hui Yeoh J, Lamneck C, Herring SE, Tchalla EYI, Heinzinger LR, et al. A1  
734 adenosine receptor signaling reduces *Streptococcus pneumoniae* adherence to pulmonary  
735 epithelial cells by targeting expression of platelet-activating factor receptor. *Cell Microbiol.*  
736 2020;22(2):e13141.

- 737 39. Bhowmick R, Tin Maung NH, Hurley BP, Ghanem EB, Gronert K, McCormick BA, et al.  
738 Systemic disease during *Streptococcus pneumoniae* acute lung infection requires 12-  
739 lipoxygenase-dependent inflammation. *J Immunol*. 2013;191(10):5115-23.
- 740 40. Frasca D, Diaz A, Romero M, Landin AM, Blomberg BB. Age effects on B cells and  
741 humoral immunity in humans. *Ageing Research Reviews*. 2011;10(3):330-5.
- 742 41. Pinti M, Appay V, Campisi J, Frasca D, Fulop T, Sauce D, et al. Aging of the immune  
743 system: Focus on inflammation and vaccination. *Eur J Immunol*. 2016;46(10):2286-301.
- 744 42. van Werkhoven CH, Huijts SM, Bolkenbaas M, Grobbee DE, Bonten MJ. The Impact of  
745 Age on the Efficacy of 13-valent Pneumococcal Conjugate Vaccine in Elderly. *Clin Infect Dis*.  
746 2015;61(12):1835-8.
- 747 43. LaFon DC, Nahm MH. Measuring immune responses to pneumococcal vaccines. *J*  
748 *Immunol Methods*. 2018;461:37-43.
- 749 44. Cundell DR, Gerard NP, Gerard C, Idanpaan-Heikkila I, Tuomanen EI. *Streptococcus*  
750 *pneumoniae* anchor to activated human cells by the receptor for platelet-activating factor. *Nature*.  
751 1995;377(6548):435-8.
- 752 45. Choi CH, Lee JS, Lee YC, Park TI, Lee JC. *Acinetobacter baumannii* invades epithelial  
753 cells and outer membrane protein A mediates interactions with epithelial cells. *BMC Microbiol*.  
754 2008;8:216.
- 755 46. Yonker LM, Pazos MA, Lanter BB, Mou H, Chu KK, Eaton AD, et al. Neutrophil-Derived  
756 Cytosolic PLA2 $\alpha$  Contributes to Bacterial-Induced Neutrophil Transepithelial Migration. *J*  
757 *Immunol*. 2017;199(8):2873-84.
- 758 47. Weinberger B, Herndler-Brandstetter D, Schwanninger A, Weiskopf D, Grubeck-  
759 Loebenstein B. Biology of Immune Responses to Vaccines in Elderly Persons. *Clinical Infectious*  
760 *Diseases*. 2008;46(7):1078-84.
- 761 48. Song JY, Moseley MA, Burton RL, Nahm MH. Pneumococcal vaccine and opsonic  
762 pneumococcal antibody. *J Infect Chemother*. 2013;19(3):412-25.

- 763 49. Simmons SR, Bhalla M, Herring SE, Tchalla EYI, Bou Ghanem EN. Older but Not Wiser:  
764 the Age-Driven Changes in Neutrophil Responses during Pulmonary Infections. *Infect Immun.*  
765 2021;89(4).
- 766 50. Kadioglu A, Andrew PW. Susceptibility and resistance to pneumococcal disease in mice.  
767 *Brief Funct Genomic Proteomic.* 2005;4(3):241-7.
- 768 51. Lin SH, Lai CC, Tan CK, Liao WH, Hsueh PR. Outcomes of hospitalized patients with  
769 bacteraemic and non-bacteraemic community-acquired pneumonia caused by *Streptococcus*  
770 *pneumoniae*. *Epidemiol Infect.* 2011;139(9):1307-16.
- 771 52. Aaberge IS, Eng J, Lermark G, Lovik M. Virulence of *Streptococcus pneumoniae* in mice:  
772 a standardized method for preparation and frozen storage of the experimental bacterial inoculum.  
773 *Microb Pathog.* 1995;18(2):141-52.
- 774 53. Tettelin H, Nelson KE, Paulsen IT, Eisen JA, Read TD, Peterson S, et al. Complete  
775 genome sequence of a virulent isolate of *Streptococcus pneumoniae*. *Science.*  
776 2001;293(5529):498-506.
- 777 54. Gonçalves MT, Mitchell TJ, Lord JM. Immune ageing and susceptibility to *Streptococcus*  
778 *pneumoniae*. *Biogerontology.* 2016;17(3):449-65.
- 779 55. Marks LR, Davidson BA, Knight PR, Hakansson AP. Interkingdom signaling induces  
780 *Streptococcus pneumoniae* biofilm dispersion and transition from asymptomatic colonization to  
781 disease. *mBio.* 2013;4(4).
- 782 56. Matanock A, Lee G, Gierke R, Kobayashi M, Leidner A, Pilishvili T. Use of 13-Valent  
783 Pneumococcal Conjugate Vaccine and 23-Valent Pneumococcal Polysaccharide Vaccine Among  
784 Adults Aged  $\geq 65$  Years: Updated Recommendations of the Advisory Committee on Immunization  
785 Practices. *MMWR Morb Mortal Wkly Rep.* 2019;68(46):1069-75.
- 786 57. Ridda I, Macintyre CR, Lindley R, Gao Z, Sullivan JS, Yuan FF, et al. Immunological  
787 responses to pneumococcal vaccine in frail older people. *Vaccine.* 2009;27(10):1628-36.

- 788 58. Buffa S, Bulati M, Pellicanò M, Dunn-Walters DK, Wu YC, Candore G, et al. B cell  
789 immunosenescence: different features of naive and memory B cells in elderly. *Biogerontology*.  
790 2011;12(5):473-83.
- 791 59. Suzuki M, Dhoubhadel BG, Ishifuji T, Yasunami M, Yaegashi M, Asoh N, et al. Serotype-  
792 specific effectiveness of 23-valent pneumococcal polysaccharide vaccine against pneumococcal  
793 pneumonia in adults aged 65 years or older: a multicentre, prospective, test-negative design  
794 study. *Lancet Infect Dis*. 2017;17(3):313-21.
- 795 60. Assaad U, El-Masri I, Porhomayon J, El-Solh AA. Pneumonia immunization in older adults:  
796 review of vaccine effectiveness and strategies. *Clin Interv Aging*. 2012;7:453-61.
- 797 61. Andrews NJ, Waight PA, George RC, Slack MP, Miller E. Impact and effectiveness of 23-  
798 valent pneumococcal polysaccharide vaccine against invasive pneumococcal disease in the  
799 elderly in England and Wales. *Vaccine*. 2012;30(48):6802-8.
- 800 62. Chao Y, Marks LR, Pettigrew MM, Hakansson AP. *Streptococcus pneumoniae* biofilm  
801 formation and dispersion during colonization and disease. *Front Cell Infect Microbiol*. 2014;4:194.
- 802 63. Eskola J, Anttila M. Pneumococcal conjugate vaccines. *Pediatr Infect Dis J*.  
803 1999;18(6):543-51.
- 804 64. Daniels CC, Rogers PD, Shelton CM. A Review of Pneumococcal Vaccines: Current  
805 Polysaccharide Vaccine Recommendations and Future Protein Antigens. *J Pediatr Pharmacol*  
806 *Ther*. 2016;21(1):27-35.
- 807



A.

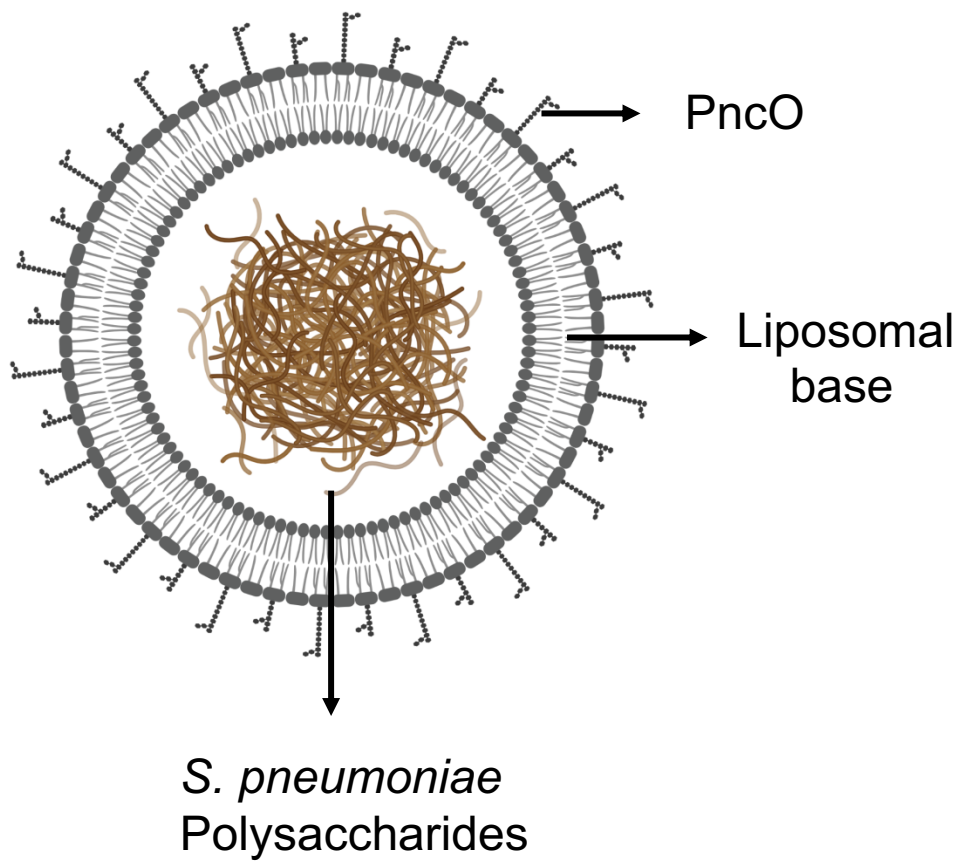

B.

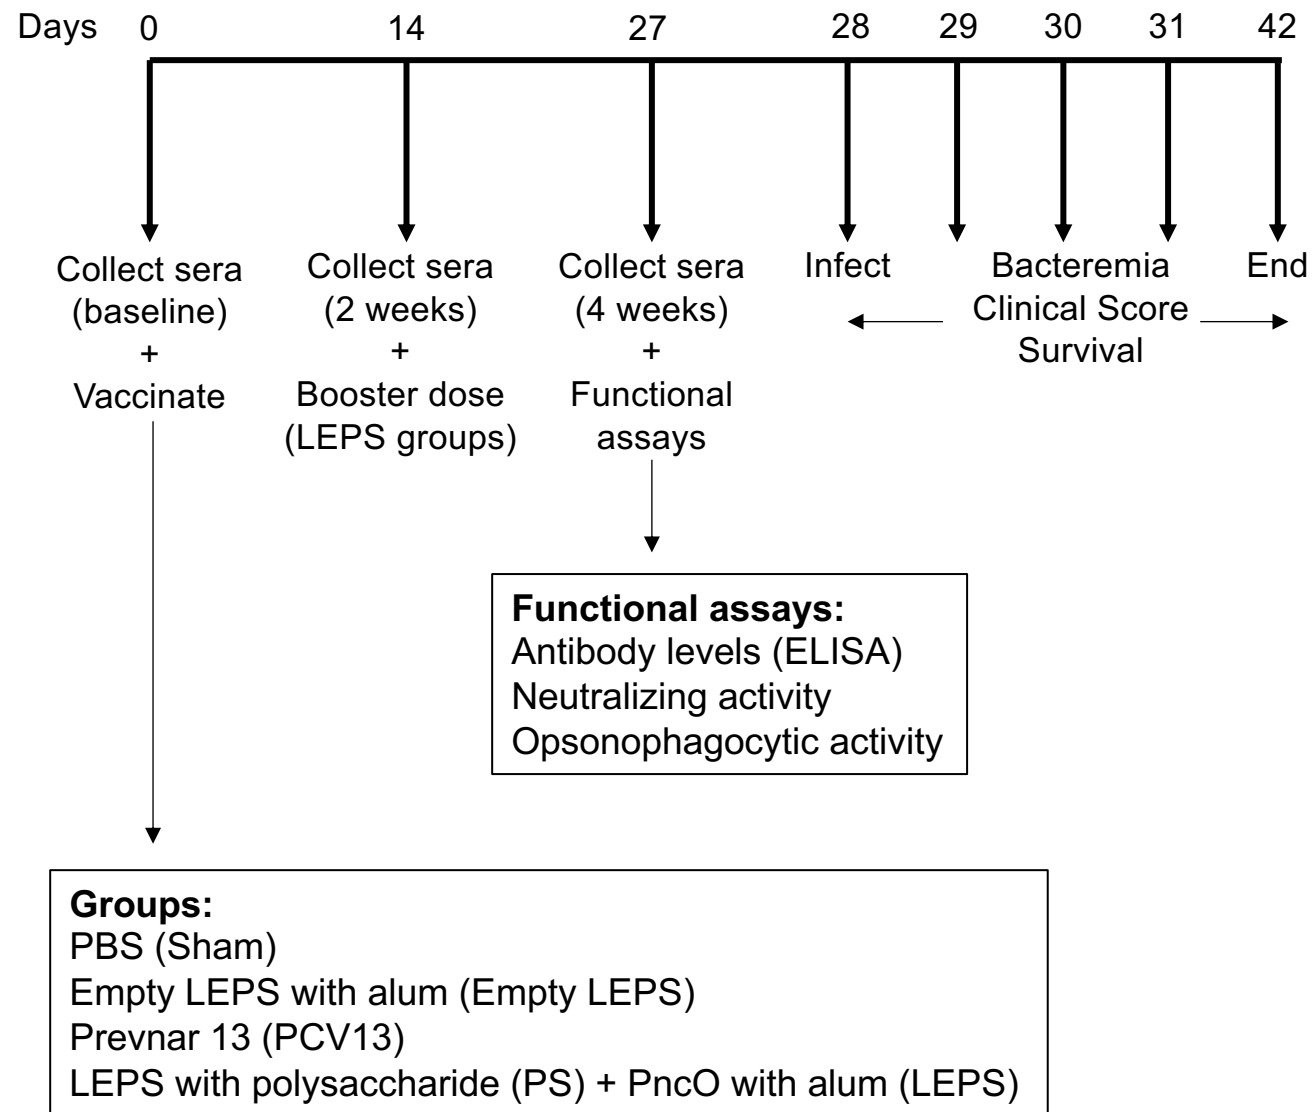

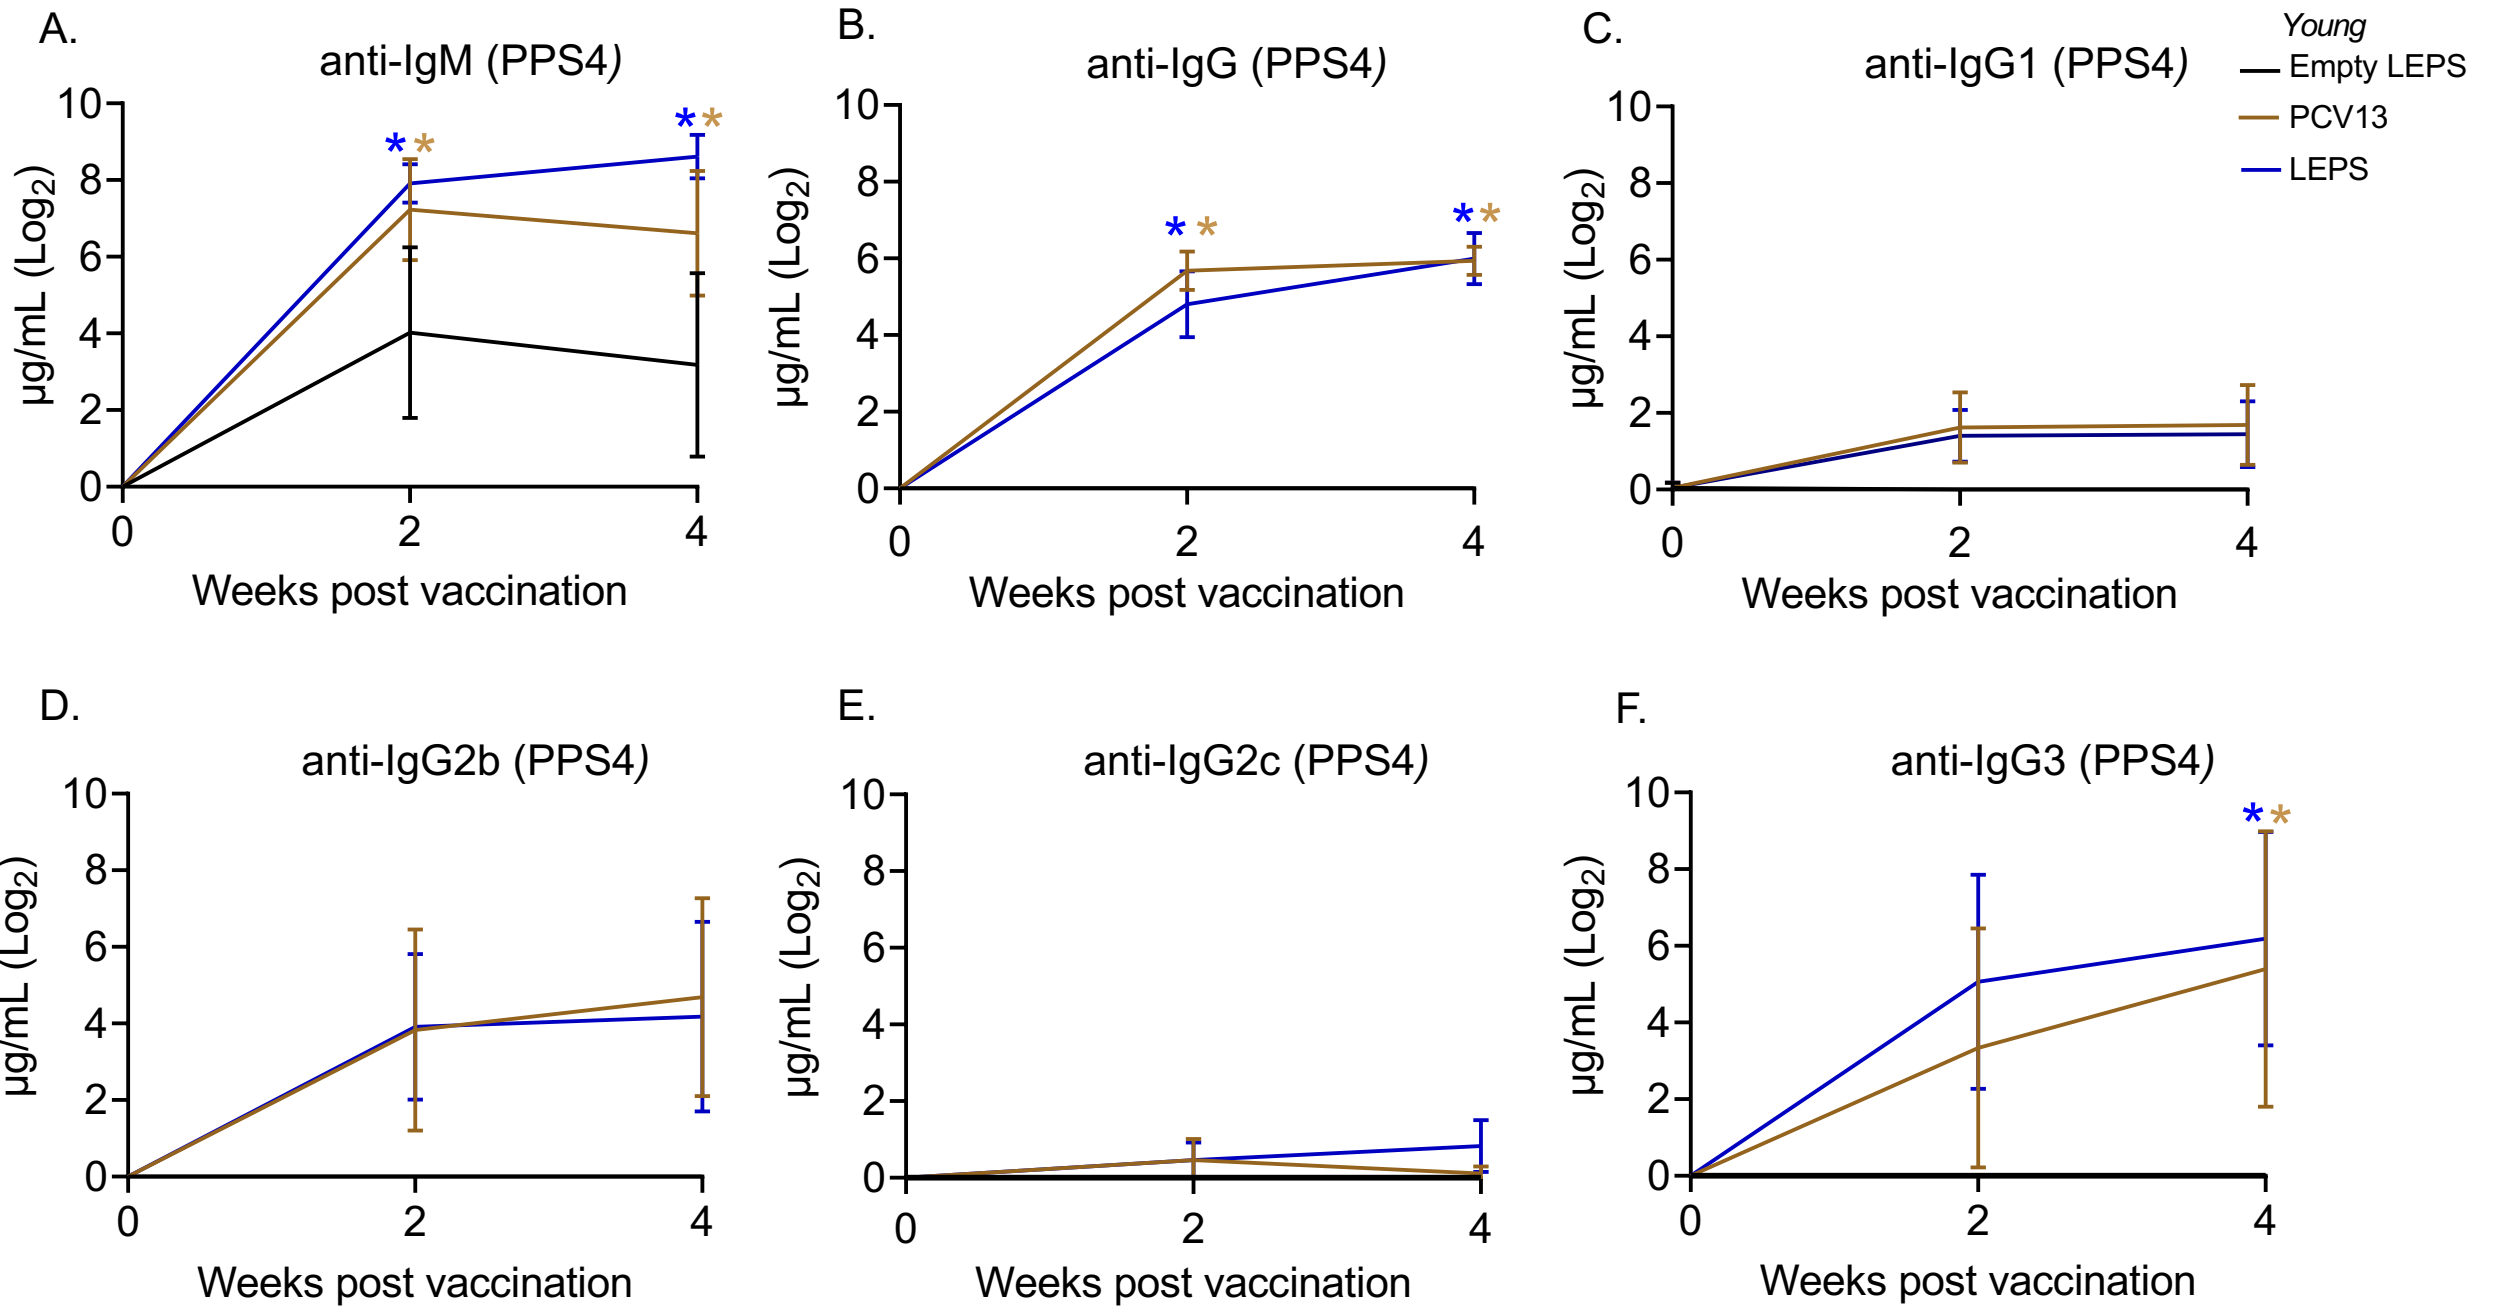

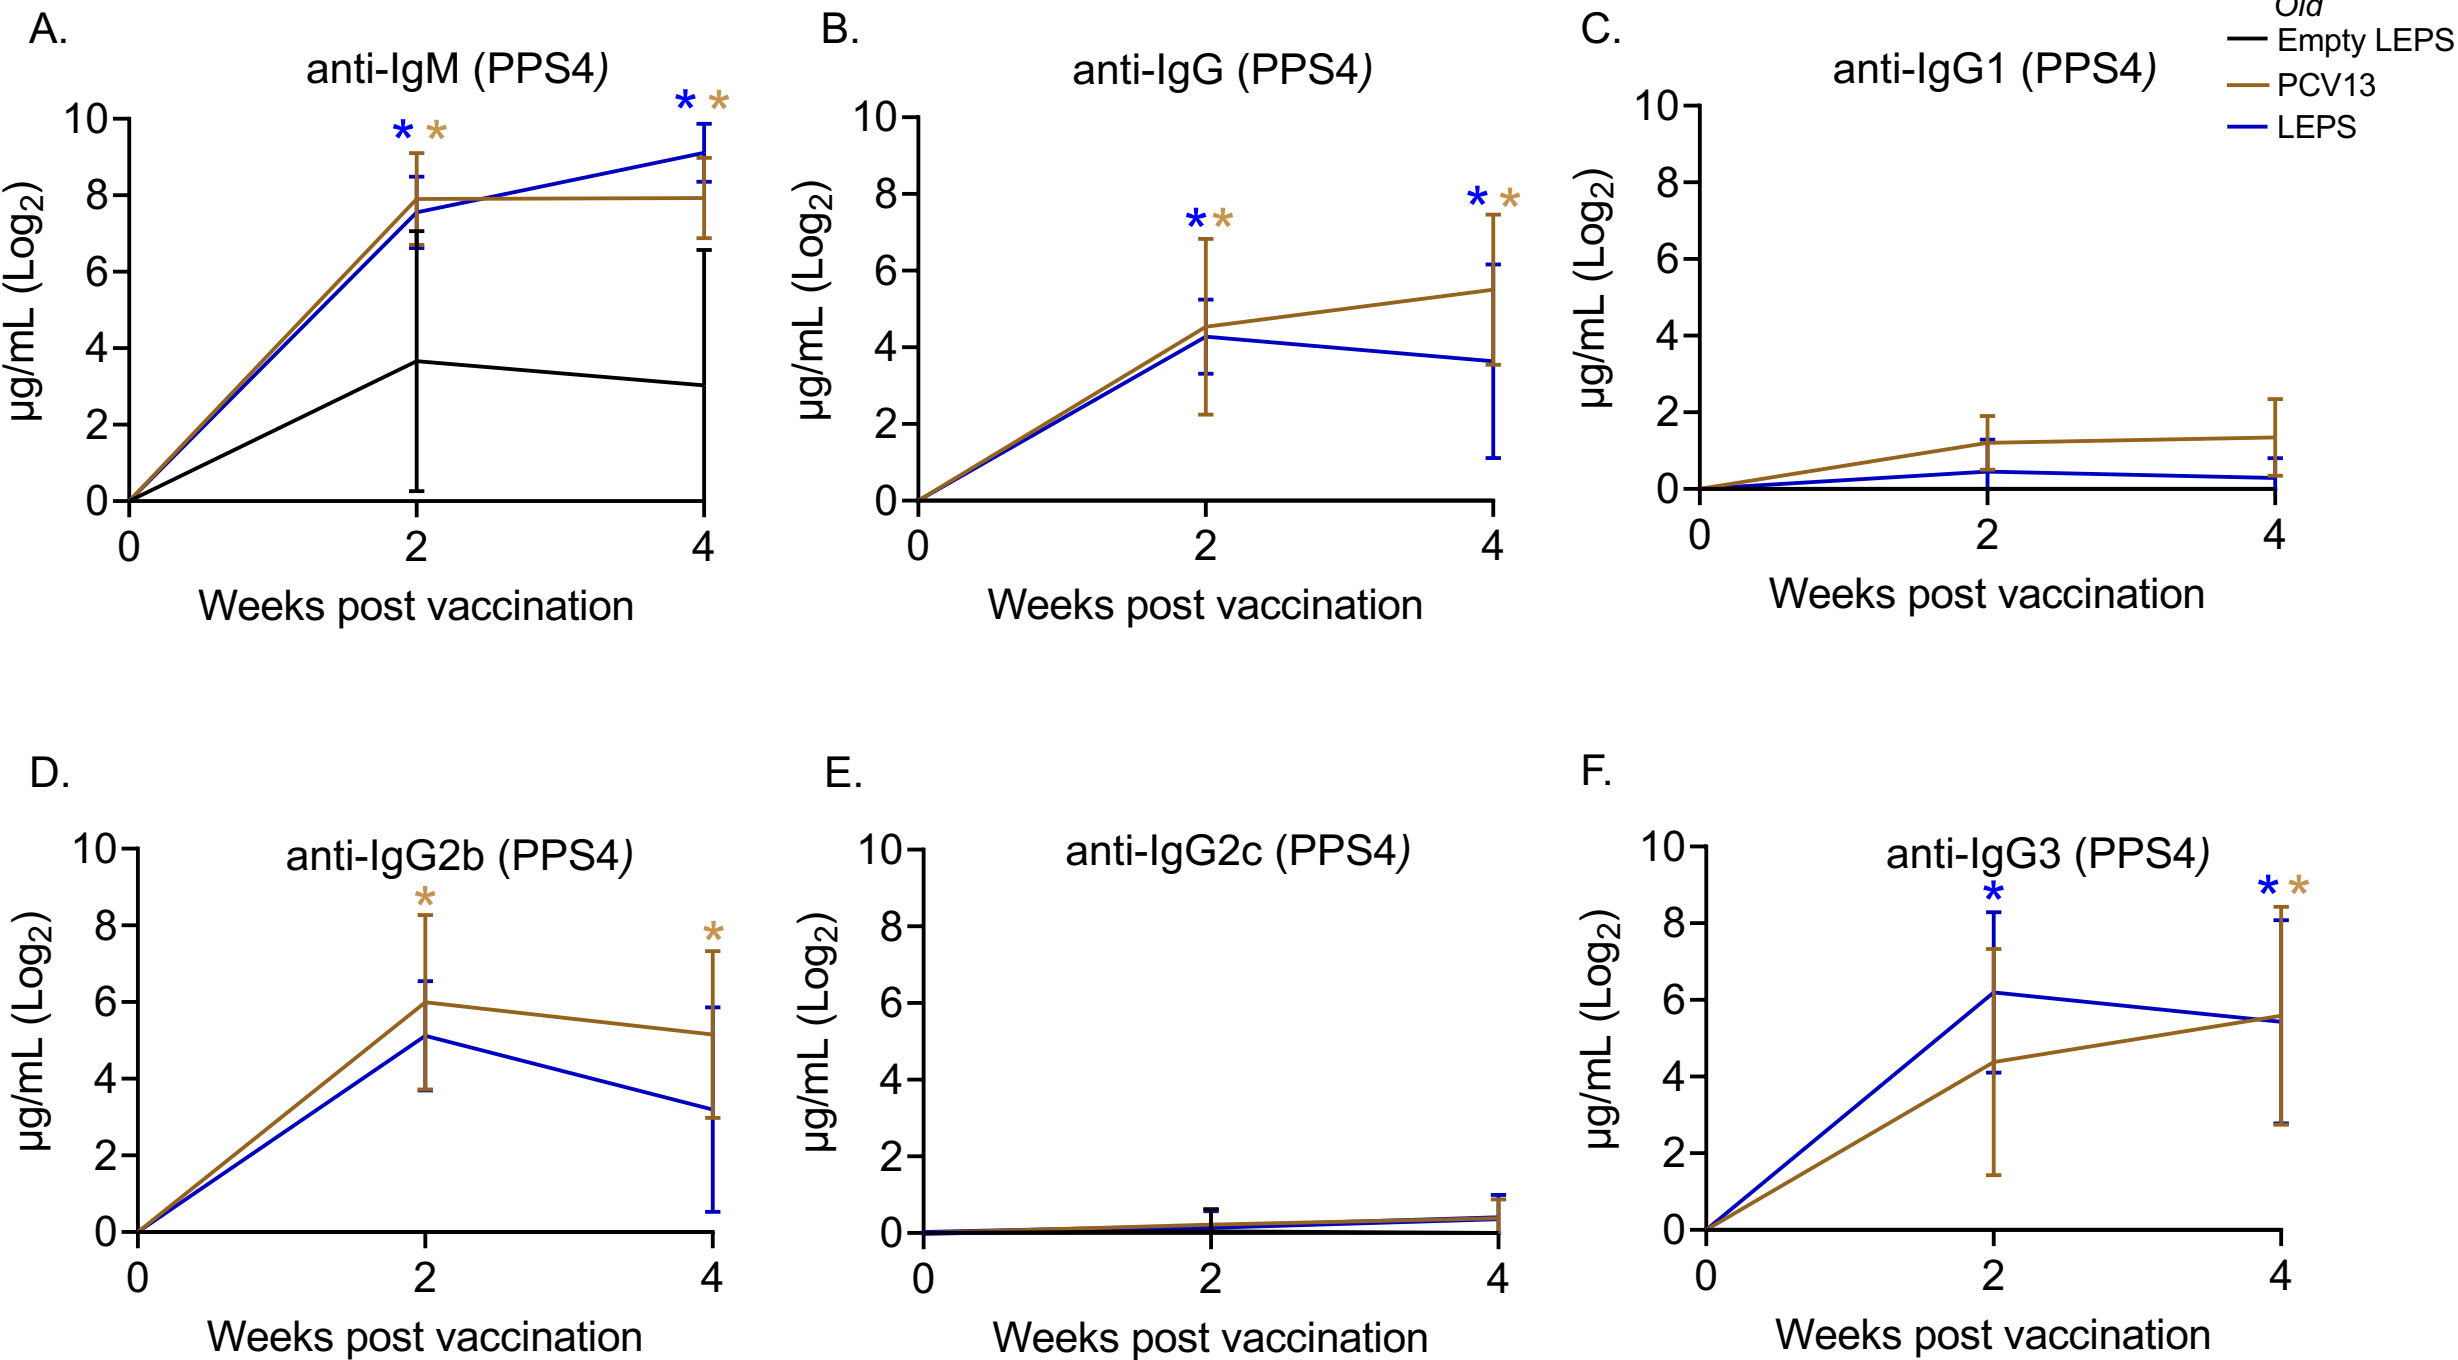

A.

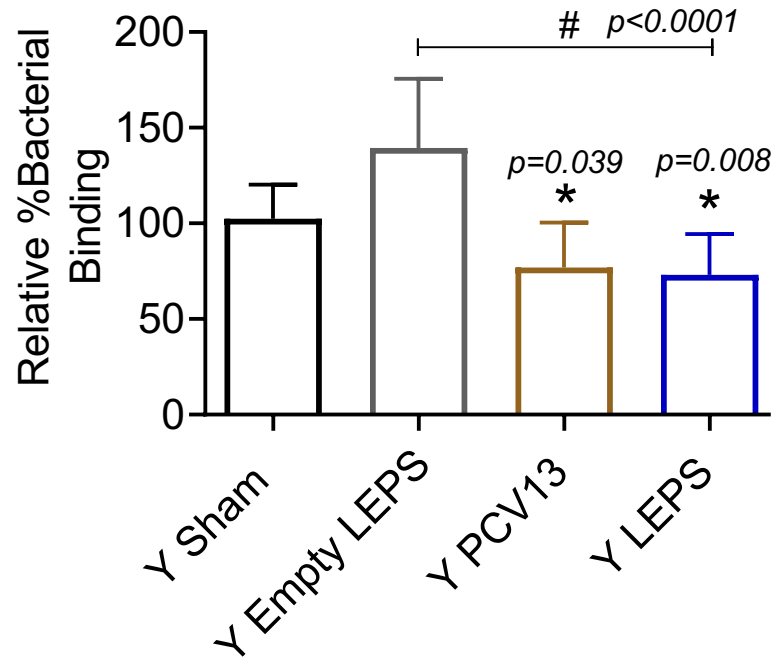

B.

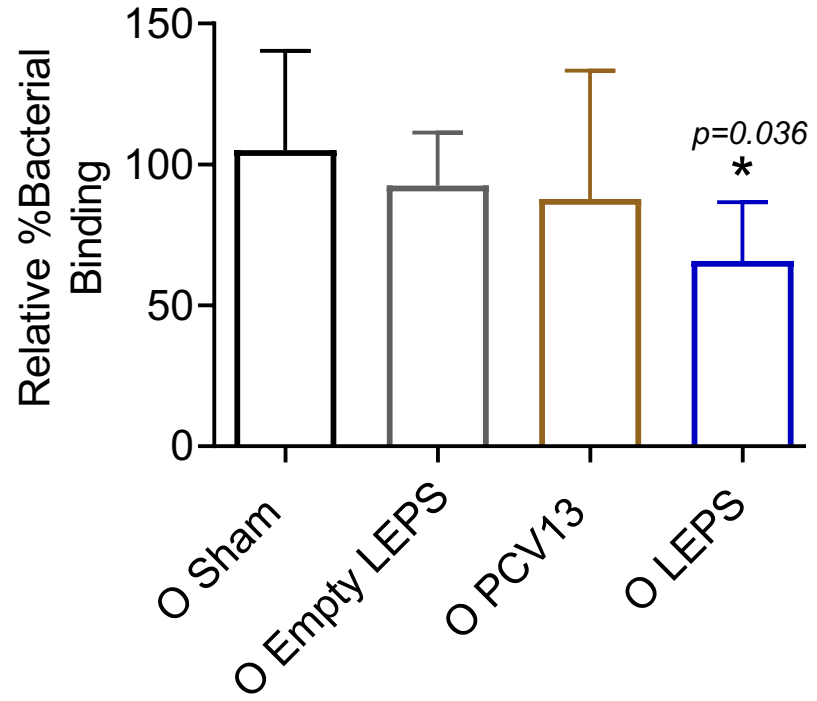

A.

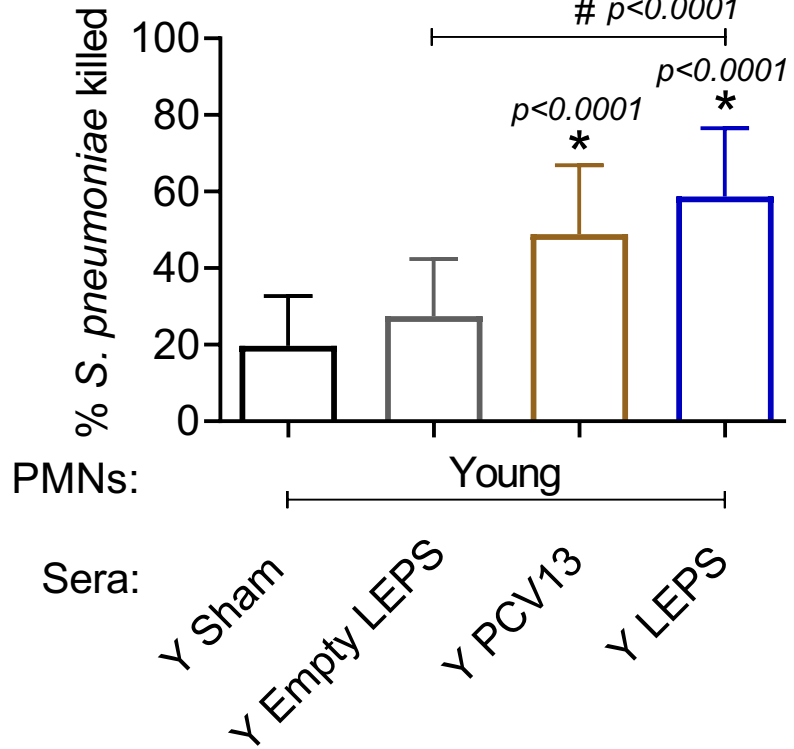

B.

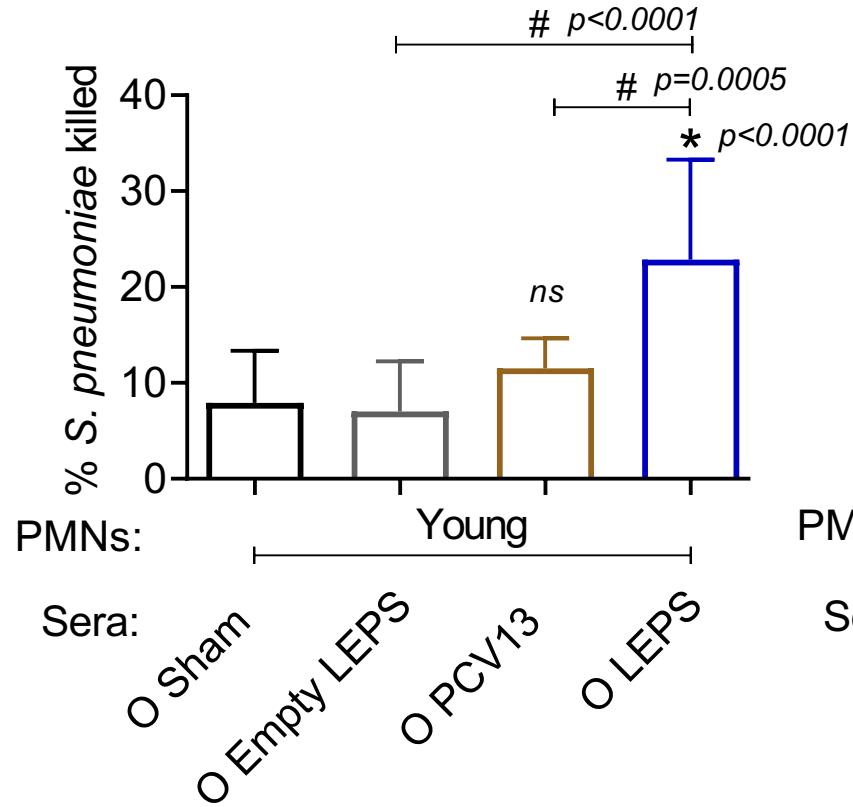

C.

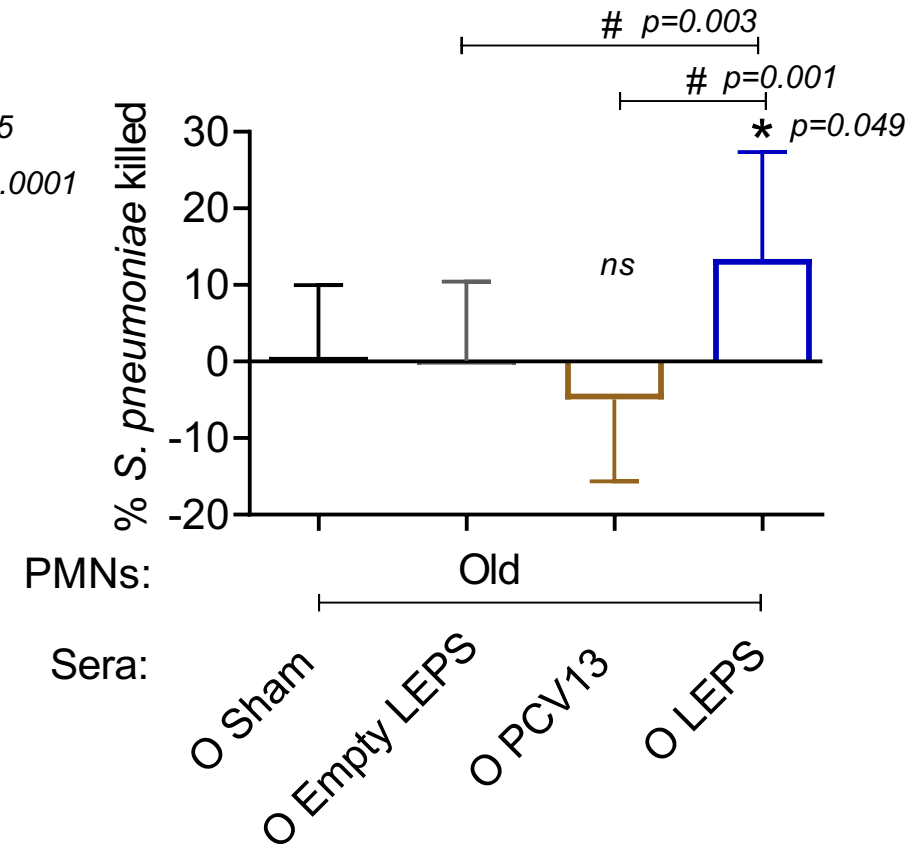

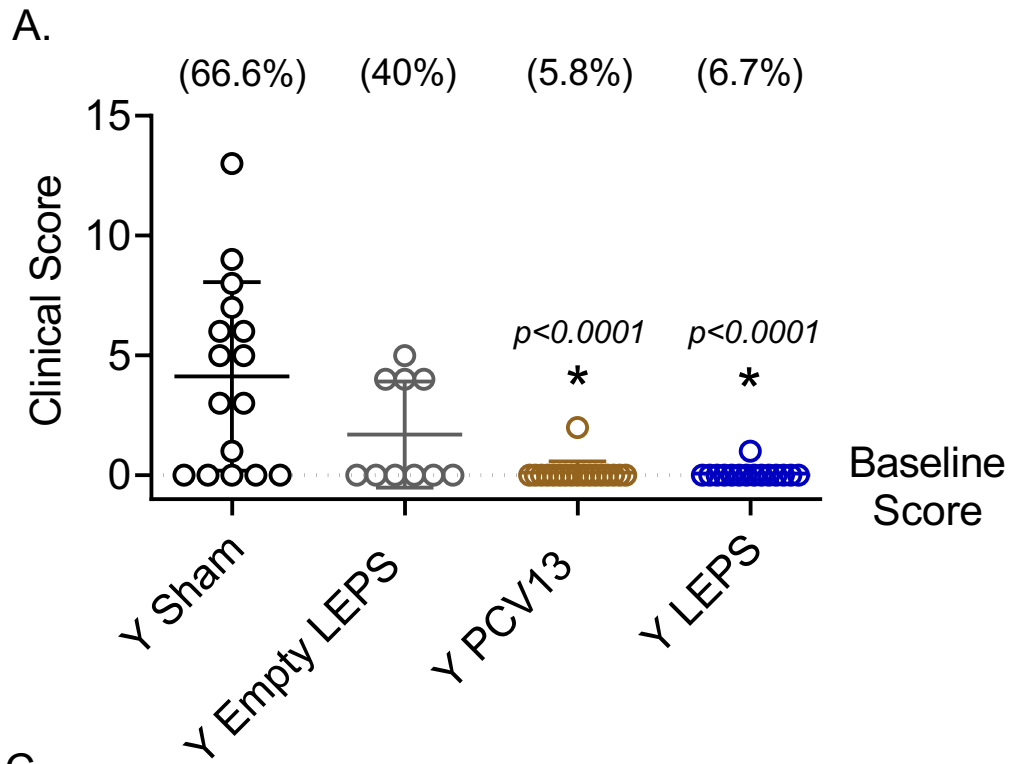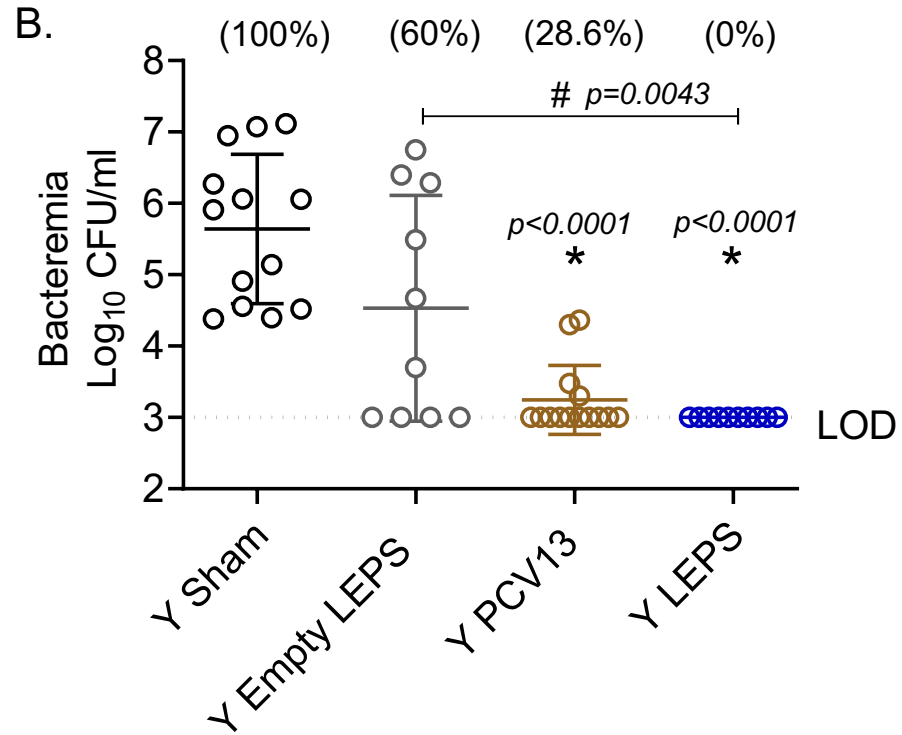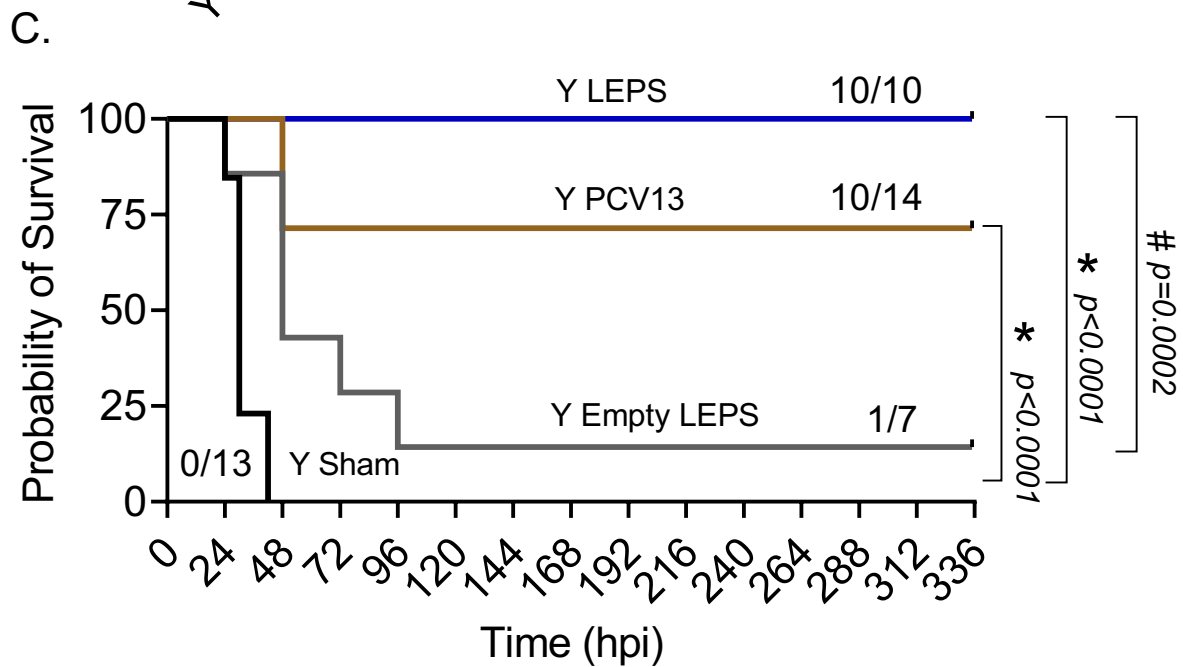

A.

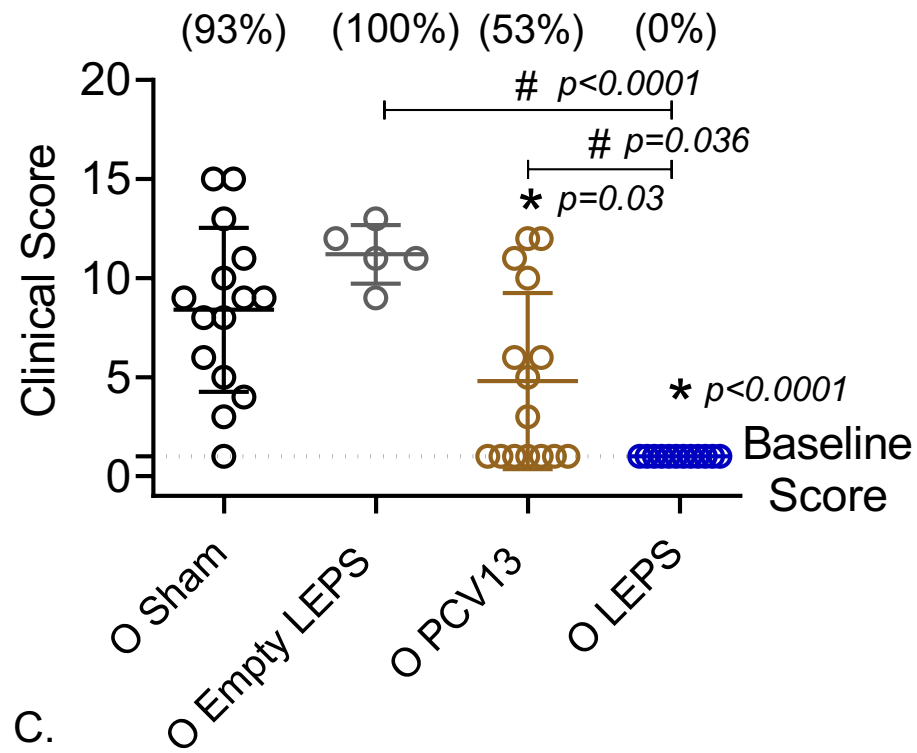

B.

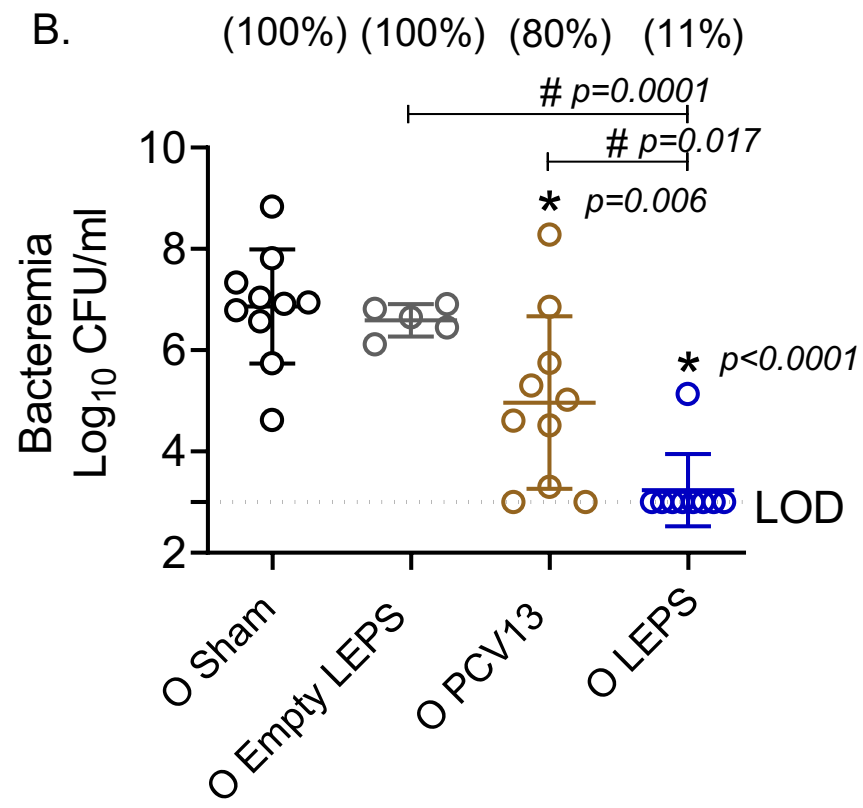

C.

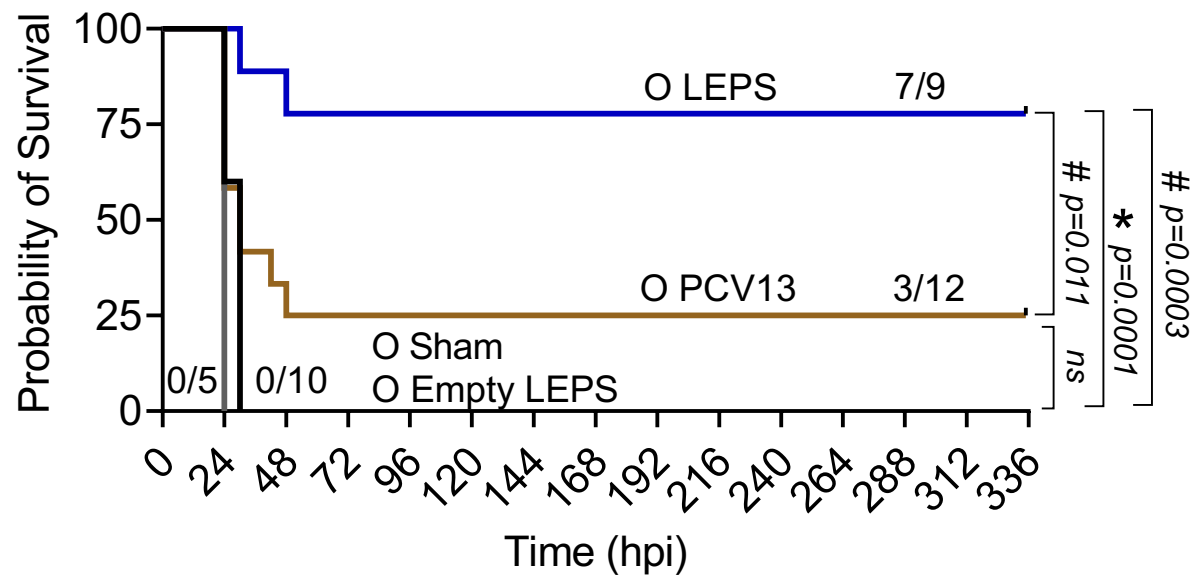

A.

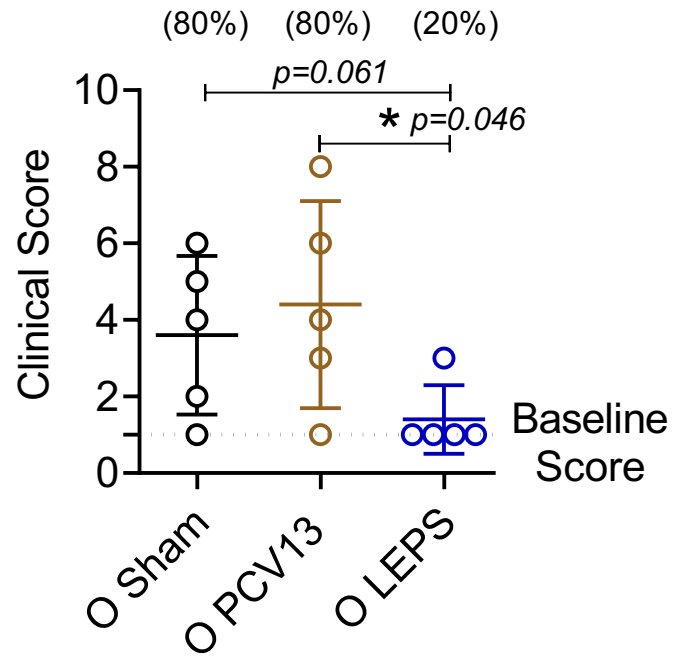

B.

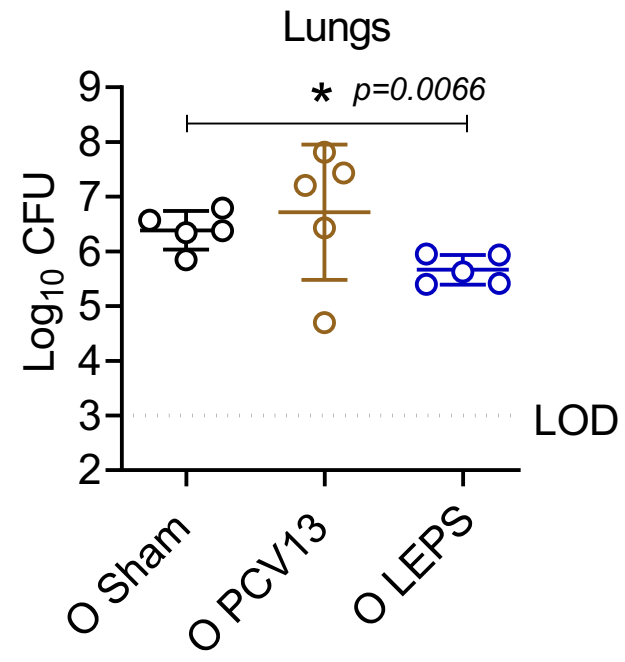

Source: https://www.biorxiv.org/content/10.1101/2021.10.18.464850v1.full.pdf
